# Supplementary material for: Reconstructing Paleofluid Circulation at the Hercynian Basement/Mesozoic Sedimentary Cover Interface in the Upper Rhine Graben
Source: Hindawi journal article supplement (doi:10.1155/2019/4849860), 2019-03-06
Supplement: f1 [file 4849860.f1.xlsx]

## Sheet: EPS1_Cores_Sandstones
EPS1
Oriented fracture core data in the Buntsandstein Sandstones
See explanation in GENTER A., CASTAING C., DEZAYES C., TENZER H., TRAINEAU H., VILLEMIN T.,
(1997) - Comparative analysis of direct (core) and indirect (borehole imaging tools)
collection of fracture data in the Hot Dry Rock Soultz reservoir (France).
Journal of Geophysical Research, Vol 102, B7, 15419-15431.
STRA	Stratification
FAUL	Fault
FENT	Jog
SYNS	synsedimentary fault
ALTE	Alteration limit
STRI	Dip/dip slip
FISS	Dry joint
NORF	Normal fault
LNOR	Normal striae
Depth MD (m)	Dip Dir	Dip	Type
1012.75	124	77	FAUL
1012.84	239	11	FENT
1012.92	125	82	FAUL
1013.69	133	82	SYNS
1013.94	140	77	FAUL
1014.13	279	80	FENT
1016.72	330	33	FENT
1016.75	8	37	FENT
1016.77	31	40	FENT
1017.35	29	85	FENT
1017.56	27	80	FENT
1017.82	0	62	FENT
1019.04	137	62	FENT
1019.21	137	75	FENT
1019.37	140	77	FENT
1019.39	56	60	FISS
1020.31	215	63	FENT
1020.41	252	65	FENT
1020.44	236	62	FENT
1020.52	213	23	FENT
1020.58	232	52	FENT
1022.91	11	55	FENT
1024.51	266	70	FENT
1025.21	284	76	FENT
1027.86	275	72	FENT
1027.96	287	72	FENT
1030.74	21	61	FENT
1031.18	216	70	FENT
1033.26	149	80	NORF
1033.45	30	81	FENT
1037.12	179	86	FENT
1039.45	3	74	FENT
1040.87	280	80	FENT
1040.97	288	62	FENT
1041.63	274	77	FENT
1043.31	273	82	FENT
1043.91	12	82	FENT
1044.94	276	75	SYNS
1044.98	262	63	FENT
1045.03	265	65	FENT
1045.34	289	80	FENT
1047.65	120	76	FENT
1047.69	109	64	NORF
1053.25	312	63	FENT
1053.85	93	65	FENT
1053.96	66	68	FENT
1054.13	161	74	FENT
1054.93	148	79	FENT
1055.42	208	48	FENT
1055.49	223	68	FENT
1056.97	17	71	FENT
1057.06	28	71	FENT
1057.16	36	78	FENT
1058.77	252	66	FENT
1062.6	316	69	FENT
1062.66	56	76	FENT
1064.61	288	75	FENT
1064.72	111	82	FENT
1064.79	293	83	FENT
1065.53	302	79	FENT
1066.35	291	70	FENT
1066.51	58	69	FENT
1066.62	71	81	FENT
1067.33	4	67	FENT
1068.7	298	84	FENT
1068.86	307	83	FENT
1076.65	302	80	FENT
1076.8	262	87	FENT
1077.38	221	84	FENT
1077.42	272	74	FENT
1079.61	252	55	SYNS
1080.37	300	70	FENT
1081.21	51	87	FENT
1082.06	50	87	FENT
1082.2	41	80	FENT
1082.86	238	85	FENT
1084.08	196	73	FENT
1084.77	35	84	FENT
1085.19	38	82	FENT
1089.66	335	58	FENT
1090.45	18	86	FENT
1093.56	186	86	FENT
1094.84	23	75	FENT
1095.22	22	78	FENT
1096.91	1	82	FENT
1097.4	28	76	FENT
1099.22	218	81	FENT
1099.36	225	83	FENT
1099.77	203	83	FENT
1102.07	180	70	FENT
1102.54	52	75	FENT
1102.61	61	78	FENT
1102.76	225	83	FENT
1104.61	56	70	FENT
1105.13	289	74	FISS
1106.26	301	84	FENT
1108.26	325	76	FENT
1108.77	160	80	SYNS
1109.52	360	81	FENT
1114.4	321	77	SYNS
1114.53	329	74	SYNS
1114.72	119	88	FENT
1114.83	324	79	SYNS
1115.55	213	76	FENT
1115.84	208	74	FENT
1115.85	47	60	FENT
1117.53	345	66	SYNS
1124.93	291	77	SYNS
1126.2	81	65	SYNS
1126.49	246	64	SYNS
1130.53	350	76	FENT
1152.44	61	79	FENT
1152.93	239	65	FENT
1153.15	69	72	FENT
1153.35	77	83	FENT
1153.65	73	72	FENT
1155.24	80	80	FENT
1155.41	95	75	FENT
1155.63	135	74	FENT
1156.5	299	84	FENT
1163.49	37	75	FENT
1165.1	26	79	FENT
1165.26	68	67	FISS
1171.87	89	73	FENT
1172.23	110	75	FENT
1172.48	286	81	FENT
1172.96	16	62	FENT
1173.55	86	64	FENT
1173.81	64	66	FENT
1174.18	81	54	FENT
1174.23	90	53	FENT
1174.4	58	41	FENT
1174.44	93	55	FENT
1174.44	104	74	FENT
1175.56	27	60	FENT
1175.7	92	58	FENT
1177.24	92	59	FENT
1177.35	261	75	FENT
1177.54	265	85	FENT
1177.61	16	51	FENT
1177.66	51	69	FENT
1178.01	284	84	FENT
1178.28	100	75	FENT
1179.74	271	76	FENT
1180.67	80	55	FENT
1181.32	86	52	FISS
1181.67	113	82	FENT
1182.25	83	88	FENT
1182.39	319	75	FENT
1183.83	269	78	FENT
1185.63	289	72	FENT
1185.75	103	81	FENT
1187.02	124	85	FISS
1189.43	319	64	FENT
1190.42	92	80	FENT
1191.11	88	46	FENT
1191.36	274	74	FENT
1191.36	50	71	FENT
1192.1	277	74	FENT
1192.42	270	72	SYNS
1196.49	89	76	FENT
1196.82	146	69	FENT
1197.24	126	73	SYNS
1197.44	128	75	FENT
1199.79	107	65	FENT
1199.99	2	56	FENT
1200.63	46	63	FENT
1200.96	298	78	FENT
1201.25	105	81	FENT
1202.05	352	77	FENT
1202.37	215	77	FENT
1202.92	231	71	FENT
1203.39	117	67	FENT
1203.68	181	82	FENT
1203.72	264	83	FENT
1205.36	256	82	FENT
1205.6	252	67	ALTE
1205.71	250	69	FENT
1205.97	235	69	FENT
1206.11	358	54	FENT
1206.17	6	65	FENT
1207.41	232	75	ALTE
1208.28	243	82	ALTE
1208.47	247	77	ALTE
1208.65	261	64	SYNS
1210.08	145	59	SYNS
1210.63	69	78	FENT
1210.8	106	71	FENT
1210.95	79	84	FENT
1211.44	71	82	FENT
1211.55	72	74	FENT
1211.95	84	67	FENT
1212.17	98	83	FENT
1212.84	342	75	FISS
1212.93	107	74	SYNS
1213.07	152	86	SYNS
1213.34	175	88	SYNS
1213.63	145	57	SYNS
1214.01	71	58	FENT
1214.07	66	51	NORF
1214.35	62	82	FENT
1214.45	262	85	FENT
1214.6	83	81	FENT
1215.02	75	73	FENT
1215.3	47	65	FENT
1215.49	72	69	FENT
1215.51	61	75	FENT
1215.6	353	78	FENT
1215.67	76	74	FENT
1215.78	79	56	FENT
1216.02	72	83	FENT
1216.4	349	78	NORF
1216.47	171	82	SYNS
1216.51	72	43	NORF
1218.8	88	49	NORF
1219.3	102	53	FENT
1221.28	71	73	FENT
1221.36	163	65	FENT
1223.41	12	73	FENT
1226.88	106	84	FENT
1227.13	254	72	FENT
1227.69	316	80	FENT
1228.44	86	88	FENT
1236.85	271	70	FENT
1239.67	173	79	FENT
1241.79	184	79	FENT
1241.81	224	67	FENT
1245.68	255	81	FENT
1248.68	185	85	FENT
1250.8	236	79	SYNS
1251.58	264	83	FENT
1260.34	53	79	FENT
1261.11	233	82	FENT
1261.2	47	79	FENT
1261.55	226	84	FENT
1268.65	245	86	FENT
1269.54	279	85	FENT
1272.46	219	67	FENT
1277.6	14	81	FENT
1278.91	73	71	FENT
1279.43	54	58	FENT
1282.24	76	72	FENT
1282.55	281	85	FENT
1284.93	333	73	SYNS
1285.17	314	68	SYNS
1292.67	149	74	FENT
1293.31	144	86	FENT
1293.68	332	82	FENT
1293.87	121	86	FENT
1295.15	25	82	FENT
1296.19	25	83	SYNS
1296.56	81	84	FENT
1296.58	39	71	FENT
1296.92	13	73	SYNS
1298.08	202	81	FENT
1298.18	23	84	FENT
1301.26	206	66	SYNS
1303.26	342	70	SYNS
1313.75	156	88	FENT
1314.89	93	62	FENT
1315.49	326	64	FENT
1323.68	101	64	FENT
1326.31	73	55	FENT
1327.4	105	54	FENT
1329.81	59	52	FENT
1330.26	67	41	FENT
1330.44	42	44	FENT
1331.79	17	51	FENT
1342.29	97	64	NORF
1348.15	299	80	SYNS
1348.94	316	58	SYNS
1349.06	298	50	SYNS
1349.1	350	32	SYNS
1349.23	312	52	NORF
1349.45	330	58	FENT
1350.01	324	70	SYNS
1350.12	312	60	FENT
1350.32	290	69	FENT
1352.98	308	70	FENT
1353.67	341	60	FENT
1362.48	115	59	FENT
1366.69	110	69	FENT
1367.41	99	55	FENT
1367.95	105	68	FENT
1368.43	114	57	FENT
1368.73	105	51	FENT
1369.24	125	76	FENT
1369.67	226	70	FENT
1369.96	219	56	FENT
1371.03	79	76	FENT
1373.48	279	74	FENT
1373.74	258	82	FENT
1374.13	253	72	FENT
1375.27	267	75	FENT
1375.57	91	76	FENT
1376.14	259	75	FENT
1376.85	251	80	FENT
1377.1	268	72	FENT
1377.39	271	82	FENT
1377.48	271	77	FENT
1377.65	81	70	FENT
1377.77	259	70	FISS
1377.91	255	72	FENT
1378.68	253	82	FENT
1378.97	283	73	FENT
1379.24	269	78	FENT
1379.85	68	83	FENT
1380.16	272	81	FENT
1380.75	53	81	FENT
1380.86	91	77	FISS
1381.07	75	85	FENT
1381.46	250	74	FENT
1381.57	256	65	SYNS
1381.64	254	77	FENT
1388.52	260	59	SYNS
1388.98	256	68	FENT
1389.12	249	87	FENT
1389.36	90	87	FENT
1390.56	89	80	SYNS
1411.56	262	84	SYNS
1415.7	235	66	SYNS
1417.84	93	72	FENT

## Sheet: EPS1_Cores_Granite
EPS1
Oriented fracture core data in the Buntsandstein Sandstones
See explanation in GENTER A. & TRAINEAU H. (1992) - Borehole EPS-1, Alsace, France : Preliminary geological results
from granite core analyses for Hot Dry Rock research
Scientific Drilling, 3, p. 205-214
See explanation in GENTER A., CASTAING C., DEZAYES C., TENZER H., TRAINEAU H., VILLEMIN T.,
1997 - Comparative analysis of direct (core) and indirect (borehole imaging tools)
collection of fracture data in the Hot Dry Rock Soultz reservoir (France).
Journal of Geophysical Research, Vol 102, B7, 15419-15431.
Decompression
JOIN	Join
Fracturation mineure
FRAC	fracture
TENS	Tension fracture
CRAC	Small fracture
Fracturation majeure
FAUL	Fault without movement
FSEN	Senestral fault
FDEX	Dextral fault
REVF	Inverse fault
NORF	Normal fault
FILO	Quartz fracture
Depth MD (m)	Dip direction	Dip	Type
1419.44	259	13	JOIN
1419.44	277	9	JOIN
1419.45	255	16	JOIN
1419.46	257	14	JOIN
1419.46	259	15	JOIN
1419.47	257	17	JOIN
1419.51	249	14	JOIN
1419.51	244	16	JOIN
1419.52	269	17	JOIN
1419.59	206	9	JOIN
1419.61	135	10	JOIN
1419.7	206	17	JOIN
1419.73	229	35	JOIN
1419.98	329	66	FRAC
1420.65	260	81	TENS
1420.79	332	71	TENS
1421.43	185	64	TENS
1422	327	66	TENS
1422.07	328	72	TENS
1422.58	176	42	TENS
1422.59	171	43	TENS
1423.07	196	50	TENS
1423.28	329	75	TENS
1424.59	173	50	TENS
1425.22	169	45	TENS
1426.36	175	40	TENS
1426.39	196	38	TENS
1426.58	174	53	TENS
1427.09	208	42	TENS
1427.09	177	44	TENS
1427.52	173	63	TENS
1427.6	179	61	FRAC
1427.65	40	62	FRAC
1427.77	192	40	TENS
1427.81	6	62	FRAC
1427.97	33	75	FAUL
1428.4	42	83	FAUL
1428.5	91	35	FRAC
1428.79	342	11	TENS
1428.85	79	22	TENS
1428.95	188	29	JOIN
1429.12	199	74	TENS
1429.24	268	80	FRAC
1429.31	168	75	TENS
1429.42	154	57	TENS
1429.64	123	74	FRAC
1429.72	163	55	FRAC
1429.8	195	52	FRAC
1429.82	218	30	JOIN
1429.88	210	27	JOIN
1430.09	212	87	FRAC
1430.47	62	79	NORF
1430.64	25	76	FRAC
1430.66	35	66	NORF
1430.75	229	67	FRAC
1430.76	245	56	FRAC
1431.13	35	53	FAUL
1431.22	221	40	FRAC
1431.23	253	51	FAUL
1431.26	222	80	FRAC
1431.26	220	61	FRAC
1431.33	244	52	FRAC
1431.44	246	68	FRAC
1431.45	165	22	JOIN
1431.5	197	48	FRAC
1431.59	315	71	FSEN
1431.68	286	58	FRAC
1431.71	242	56	FAUL
1431.8	262	45	FRAC
1431.88	305	58	FAUL
1431.89	46	72	FRAC
1431.96	310	58	FSEN
1432.01	196	79	FRAC
1432.03	154	81	FRAC
1432.04	280	33	FSEN
1432.05	287	59	FAUL
1432.1	96	89	FAUL
1432.11	234	23	FAUL
1432.13	329	37	FAUL
1432.17	328	55	FAUL
1432.17	187	83	FRAC
1432.22	310	71	FRAC
1432.23	310	22	FSEN
1432.35	337	62	FAUL
1432.36	326	41	FSEN
1432.41	314	42	FSEN
1432.47	285	60	FRAC
1432.52	279	55	FAUL
1432.52	295	44	FRAC
1432.56	324	49	FRAC
1432.64	13	75	FAUL
1432.68	265	59	FRAC
1432.72	302	37	FSEN
1432.82	307	53	FAUL
1432.85	40	58	FAUL
1432.93	27	72	FAUL
1433.04	35	74	FAUL
1433.04	52	54	FAUL
1433.19	37	74	FAUL
1433.25	27	75	FAUL
1433.25	206	43	FAUL
1433.28	329	65	FAUL
1433.33	40	64	FAUL
1433.49	56	53	FAUL
1433.51	232	59	FAUL
1433.52	24	72	FAUL
1433.68	335	75	FRAC
1433.68	167	85	FAUL
1433.73	64	83	FAUL
1433.87	35	65	FAUL
1433.89	235	73	FRAC
1433.91	14	85	FAUL
1433.91	38	73	FRAC
1433.92	194	60	FRAC
1433.94	34	71	OPEN
1434	46	78	TENS
1434.2	21	57	FRAC
1434.23	22	60	FRAC
1434.28	65	68	FAUL
1434.32	48	65	FRAC
1434.4	243	83	FAUL
1434.42	70	65	FRAC
1434.55	235	47	FRAC
1434.62	198	23	JOIN
1434.67	153	28	FAUL
1434.78	174	49	FAUL
1434.8	181	50	FAUL
1434.83	273	82	FRAC
1435.1	148	52	FRAC
1435.24	220	55	FRAC
1435.32	254	78	FRAC
1435.33	263	81	FRAC
1435.34	214	37	JOIN
1435.56	82	73	FAUL
1435.59	228	69	FRAC
1435.61	251	75	FAUL
1435.62	167	55	FRAC
1435.65	146	62	FRAC
1435.67	109	65	FRAC
1436.04	193	60	FRAC
1436.15	212	63	FRAC
1436.52	348	80	FAUL
1436.67	81	61	FRAC
1436.84	67	85	FAUL
1436.87	61	83	FAUL
1436.88	54	76	FAUL
1436.89	231	71	FRAC
1436.99	245	79	FAUL
1437.06	62	81	FAUL
1437.06	55	77	FRAC
1437.11	275	21	FAUL
1437.16	256	35	FRAC
1437.41	158	42	FRAC
1437.51	85	75	FAUL
1437.62	198	26	JOIN
1437.63	252	78	FRAC
1437.81	178	40	FAUL
1438.02	175	17	JOIN
1438.13	185	16	JOIN
1438.18	328	72	FRAC
1438.32	165	43	FRAC
1438.51	268	77	FRAC
1438.69	100	70	FRAC
1438.92	255	53	FRAC
1438.94	229	66	FRAC
1439.11	201	15	JOIN
1439.15	159	19	JOIN
1439.2	290	22	FRAC
1439.22	328	65	FRAC
1439.61	177	24	JOIN
1439.67	148	60	FAUL
1440.19	278	76	FRAC
1440.19	276	76	FRAC
1440.51	329	67	FRAC
1441.12	109	86	FRAC
1441.33	259	39	JOIN
1441.45	66	60	FRAC
1441.66	186	87	FRAC
1441.78	94	70	FAUL
1441.94	343	71	TENS
1442	216	35	JOIN
1443.37	42	24	JOIN
1443.39	64	53	FRAC
1443.45	27	37	JOIN
1443.6	83	72	FAUL
1443.65	45	39	JOIN
1443.82	32	39	JOIN
1443.86	44	33	JOIN
1444	101	72	FRAC
1444.26	79	69	FAUL
1444.53	63	66	FAUL
1444.63	74	64	FAUL
1444.72	22	32	FRAC
1444.83	72	57	FAUL
1444.85	62	58	FAUL
1445.03	83	50	FRAC
1445.31	75	59	FAUL
1445.53	96	66	FAUL
1445.84	317	52	FRAC
1445.87	78	78	FAUL
1445.95	292	61	FRAC
1445.96	76	86	FRAC
1446.03	312	55	TENS
1446.09	67	50	FRAC
1446.1	228	45	FRAC
1446.12	255	24	FRAC
1446.18	63	54	FRAC
1446.23	58	62	FRAC
1446.38	81	45	FRAC
1446.46	99	68	FRAC
1446.48	268	61	FRAC
1446.57	69	69	FRAC
1446.64	80	66	FRAC
1446.68	79	65	FRAC
1446.71	68	66	FRAC
1446.74	64	57	FAUL
1446.79	69	58	FRAC
1446.8	85	75	FRAC
1446.84	67	48	FRAC
1446.94	216	47	FRAC
1447.12	72	75	FRAC
1447.16	77	75	FRAC
1447.2	81	78	FRAC
1447.3	150	60	FRAC
1447.55	190	42	FRAC
1447.62	92	67	FRAC
1447.76	28	65	FRAC
1447.8	207	34	JOIN
1447.87	214	37	JOIN
1447.95	203	44	FRAC
1448.14	87	72	FAUL
1448.19	66	72	FRAC
1448.26	79	70	FRAC
1448.38	186	50	FRAC
1448.57	188	58	FRAC
1448.59	182	41	FRAC
1448.63	195	49	FRAC
1448.74	207	17	JOIN
1448.82	83	77	FRAC
1449.04	306	66	FRAC
1449.15	84	77	FRAC
1449.42	338	65	FRAC
1450.92	209	41	FRAC
1450.94	49	55	FRAC
1451.23	268	26	JOIN
1451.32	56	75	TENS
1451.36	230	41	TENS
1451.42	173	47	FRAC
1451.48	272	80	FRAC
1451.69	222	29	JOIN
1451.75	15	90	FRAC
1451.91	54	56	FRAC
1451.98	117	66	FRAC
1452.01	54	69	FRAC
1452.17	55	68	FAUL
1452.27	53	84	FRAC
1452.36	71	81	FRAC
1452.52	279	21	JOIN
1452.54	86	70	FRAC
1452.7	82	68	FAUL
1452.78	340	77	FRAC
1452.88	64	83	FRAC
1453.02	315	61	FRAC
1453.19	299	45	FRAC
1453.45	354	69	FRAC
1453.52	302	76	FAUL
1453.59	305	75	FRAC
1453.62	283	52	FRAC
1453.69	283	56	FRAC
1453.84	300	47	FRAC
1454.02	61	60	FRAC
1454.06	63	58	REVF
1454.08	61	56	FRAC
1454.36	109	76	FRAC
1454.41	52	59	FRAC
1454.54	323	35	FRAC
1454.65	309	69	FRAC
1454.73	6	89	FRAC
1454.78	45	65	FRAC
1454.84	279	60	FRAC
1454.88	47	61	FRAC
1454.97	342	61	FRAC
1455.1	50	59	FRAC
1455.1	40	64	FAUL
1455.13	43	65	FAUL
1455.17	337	76	FRAC
1455.21	44	65	FRAC
1455.24	200	85	FRAC
1455.25	31	68	FRAC
1455.28	269	33	FRAC
1455.3	64	70	FAUL
1455.34	124	87	TENS
1455.37	37	76	FRAC
1455.46	46	73	FAUL
1455.56	53	74	FAUL
1455.68	46	65	FAUL
1455.82	55	64	OPEN
1455.88	211	78	FRAC
1455.92	265	51	FRAC
1455.93	176	53	FRAC
1455.97	82	58	FAUL
1456.08	209	39	JOIN
1456.11	79	74	FAUL
1456.14	63	68	FAUL
1456.21	228	45	FRAC
1456.23	191	42	FRAC
1456.3	71	60	FRAC
1456.3	91	73	FRAC
1456.31	41	65	FAUL
1456.33	276	80	FRAC
1456.53	270	69	FRAC
1456.62	87	58	FAUL
1456.66	76	43	FRAC
1456.69	311	71	TENS
1456.79	62	62	FAUL
1456.89	67	56	FAUL
1457.01	223	34	FRAC
1457.1	78	61	TENS
1457.1	283	37	FRAC
1457.12	287	58	FRAC
1457.12	80	62	FRAC
1457.14	266	32	FRAC
1457.25	261	77	FRAC
1457.26	202	52	FRAC
1457.29	13	89	FRAC
1457.3	153	70	FRAC
1457.31	159	75	FAUL
1457.34	53	87	FRAC
1457.34	275	74	FRAC
1457.35	14	89	FRAC
1457.36	270	72	FAUL
1457.39	272	59	FRAC
1457.42	270	67	FRAC
1457.43	178	62	FRAC
1457.52	179	46	FRAC
1457.55	250	59	FRAC
1457.57	253	40	REVF
1457.57	197	61	FRAC
1457.64	217	42	FRAC
1457.68	275	70	FRAC
1457.71	253	76	FRAC
1457.75	308	89	FRAC
1457.76	217	24	JOIN
1457.81	72	69	FRAC
1457.97	277	59	FRAC
1458.11	84	63	FRAC
1458.27	287	58	REVF
1458.34	291	26	NORF
1458.4	223	42	FRAC
1458.42	0	86	FAUL
1458.45	281	61	FAUL
1458.47	312	52	FRAC
1458.51	251	60	FDEX
1458.84	207	75	FAUL
1458.85	210	85	FRAC
1458.87	33	59	FAUL
1458.96	225	63	FAUL
1459.65	250	62	FRAC
1459.67	210	23	FRAC
1459.69	264	14	FRAC
1459.71	192	49	FRAC
1459.73	306	13	FRAC
1459.81	124	82	FRAC
1459.81	354	85	FAUL
1459.88	284	49	FRAC
1459.92	271	75	FAUL
1460.01	200	40	JOIN
1460.07	323	88	FRAC
1460.16	70	81	FAUL
1460.2	243	82	FAUL
1460.23	292	82	FRAC
1460.36	92	85	FSEN
1460.46	205	26	JOIN
1460.58	313	90	FAUL
1460.59	283	88	FRAC
1460.65	86	57	FRAC
1460.68	167	52	FRAC
1460.73	62	90	FRAC
1460.76	213	37	FRAC
1461.06	42	68	OPEN
1461.22	251	64	FRAC
1461.41	276	44	FRAC
1461.42	60	70	OPEN
1461.57	255	57	FRAC
1461.59	244	54	FRAC
1461.74	268	62	FRAC
1461.82	60	81	FRAC
1461.83	84	80	FAUL
1461.91	89	81	FAUL
1462.13	120	71	FRAC
1462.21	42	81	FAUL
1462.25	210	69	FRAC
1462.44	144	84	FRAC
1462.48	56	74	NORF
1462.5	51	80	FRAC
1462.66	259	79	FRAC
1462.68	55	74	FRAC
1462.82	269	80	FAUL
1462.83	80	77	FAUL
1462.84	80	81	FAUL
1463.04	112	48	FRAC
1463.14	71	2	JOIN
1463.15	240	79	FRAC
1463.24	45	56	FAUL
1463.26	59	72	FAUL
1463.29	189	21	FRAC
1463.31	228	43	FRAC
1463.34	48	59	FAUL
1463.36	210	33	FRAC
1463.4	207	26	FRAC
1463.46	200	34	FRAC
1463.49	230	36	FRAC
1463.53	206	48	FAUL
1463.54	213	72	FAUL
1463.57	210	28	FAUL
1463.62	163	48	FAUL
1463.66	228	82	FRAC
1463.85	206	69	FRAC
1463.85	357	61	FAUL
1463.88	165	16	JOIN
1463.91	209	11	JOIN
1463.92	245	44	FRAC
1463.96	327	76	FRAC
1464.04	242	65	FRAC
1464.05	186	88	FAUL
1464.05	213	17	JOIN
1464.15	50	71	FRAC
1464.28	49	64	FAUL
1464.43	192	5	JOIN
1464.45	53	80	FRAC
1464.51	284	60	FRAC
1464.65	31	70	FAUL
1464.74	241	60	FAUL
1464.76	199	62	FRAC
1464.81	214	62	FRAC
1464.87	249	45	FRAC
1464.88	226	69	FRAC
1464.92	52	70	FRAC
1464.92	72	78	FRAC
1465.01	191	30	JOIN
1465.05	236	82	FRAC
1465.1	195	17	JOIN
1465.24	280	56	FRAC
1465.25	153	29	JOIN
1465.27	105	73	FRAC
1465.28	279	64	FRAC
1465.3	261	86	FRAC
1465.33	278	74	FAUL
1465.4	183	15	JOIN
1465.41	116	85	FAUL
1465.43	24	89	TENS
1465.67	273	52	NORF
1465.69	96	83	FRAC
1465.74	222	72	FRAC
1465.79	291	71	FAUL
1465.82	61	86	TENS
1465.82	73	63	FRAC
1465.85	256	74	FRAC
1465.87	279	87	FRAC
1466	339	71	TENS
1466	50	74	FAUL
1466.08	116	76	TENS
1466.09	116	86	FAUL
1466.18	156	81	TENS
1466.18	152	52	TENS
1466.19	231	80	FAUL
1466.22	258	39	TENS
1466.33	26	89	FRAC
1466.34	173	75	FRAC
1466.4	321	10	JOIN
1466.68	59	89	FRAC
1466.72	273	55	FAUL
1466.89	61	60	FSEN
1466.89	113	88	FRAC
1466.9	291	13	NORF
1467.06	293	10	JOIN
1467.1	3	85	FRAC
1467.15	262	31	JOIN
1467.3	263	32	JOIN
1467.44	298	19	JOIN
1467.47	302	36	JOIN
1467.51	314	18	JOIN
1467.6	207	90	FRAC
1467.67	145	62	FRAC
1467.72	312	85	FRAC
1467.79	135	80	FRAC
1467.89	72	82	FAUL
1468.06	333	46	FRAC
1468.19	70	82	FRAC
1468.41	87	82	FRAC
1468.47	77	72	FRAC
1468.64	68	84	FRAC
1468.75	328	41	FRAC
1468.75	182	21	JOIN
1468.78	84	87	FRAC
1468.86	67	82	FAUL
1468.97	78	74	FRAC
1469.08	69	78	FRAC
1469.16	71	82	FRAC
1469.27	70	71	FDEX
1469.33	90	62	NORF
1469.51	68	73	FAUL
1469.55	146	75	TENS
1469.59	313	65	FRAC
1469.62	297	65	FRAC
1469.64	65	59	FRAC
1469.67	60	74	FDEX
1469.68	282	78	FAUL
1469.68	302	71	FRAC
1469.71	85	66	FRAC
1469.8	59	83	FAUL
1470.03	81	89	FRAC
1470.1	78	74	FAUL
1470.17	66	79	FAUL
1470.26	205	79	FRAC
1470.29	72	72	FAUL
1470.47	81	66	FDEX
1470.55	83	67	FAUL
1470.64	74	74	FRAC
1470.65	86	84	FRAC
1470.79	56	75	FRAC
1471.01	89	67	FAUL
1471.03	73	75	FAUL
1471.06	137	83	FRAC
1471.2	71	72	FRAC
1471.26	123	83	FAUL
1471.33	279	75	FAUL
1471.39	289	68	FAUL
1471.43	265	72	FAUL
1471.66	296	50	FRAC
1471.67	313	50	FRAC
1471.7	327	52	FRAC
1471.81	273	68	FAUL
1471.85	290	64	FAUL
1471.88	281	80	FRAC
1471.89	276	81	FSEN
1471.9	0	45	FRAC
1472.12	226	35	FRAC
1472.18	282	62	FAUL
1472.35	1	47	FRAC
1472.39	284	77	FAUL
1472.44	176	51	FRAC
1472.47	319	64	TENS
1473	281	60	FAUL
1473.4	56	48	FRAC
1473.76	300	80	FSEN
1473.84	306	84	FRAC
1474.3	300	81	TENS
1474.4	131	62	TENS
1474.77	47	81	FRAC
1474.92	34	73	FRAC
1475.04	40	72	FRAC
1475.39	110	78	TENS
1475.46	95	59	FAUL
1475.6	79	76	FRAC
1475.61	81	80	FRAC
1475.9	175	48	FRAC
1476.01	39	69	FAUL
1476.09	192	39	FRAC
1476.23	87	67	FAUL
1476.84	245	64	FRAC
1476.96	177	53	FRAC
1477.05	12	76	FRAC
1477.48	142	59	FRAC
1477.69	155	46	FRAC
1477.72	169	55	FRAC
1478.05	169	10	FRAC
1478.07	164	13	FRAC
1478.11	183	6	JOIN
1478.38	130	74	FRAC
1478.47	136	77	FRAC
1478.77	279	77	TENS
1478.85	141	80	TENS
1478.89	253	64	TENS
1478.92	257	66	TENS
1479.09	273	71	CRAC
1479.2	346	86	FRAC
1479.35	259	68	CRAC
1480.1	191	84	CRAC
1480.17	2	65	FRAC
1480.51	274	49	FRAC
1480.57	176	21	JOIN
1480.61	112	82	FAUL
1480.62	297	81	FAUL
1480.71	252	80	CRAC
1481.21	279	71	FRAC
1481.27	263	72	FRAC
1481.9	197	81	NORF
1482.26	257	88	FRAC
1482.5	7	29	TENS
1482.58	266	85	FRAC
1482.59	268	78	FAUL
1482.81	45	81	FRAC
1482.87	285	69	FDEX
1483.36	87	82	FRAC
1483.63	26	60	TENS
1483.89	78	86	FRAC
1483.96	183	67	TENS
1484.02	127	18	JOIN
1484.37	93	81	FAUL
1484.68	77	83	FRAC
1484.8	102	85	FRAC
1484.99	182	85	FAUL
1485.07	298	89	FRAC
1485.49	72	81	FAUL
1485.69	223	79	FAUL
1485.93	64	82	FAUL
1486.22	79	76	FRAC
1486.26	61	82	FRAC
1486.57	197	53	TENS
1486.61	228	83	FRAC
1486.78	57	81	FSEN
1486.81	218	44	FRAC
1486.95	253	76	FRAC
1487	175	6	JOIN
1487.19	117	72	FRAC
1487.6	10	37	TENS
1487.73	217	44	TENS
1487.91	212	63	TENS
1488.07	53	78	FAUL
1488.09	292	86	FRAC
1488.11	114	61	NORF
1488.11	233	88	FRAC
1488.17	18	76	TENS
1488.27	196	59	FRAC
1488.29	76	68	TENS
1488.51	76	83	FRAC
1488.94	28	81	FDEX
1489.01	58	70	FRAC
1489.08	212	74	FAUL
1489.19	193	41	FRAC
1489.34	271	51	CRAC
1489.47	263	81	TENS
1489.47	296	62	TENS
1489.48	236	65	FAUL
1489.54	329	80	CRAC
1489.54	272	80	CRAC
1489.57	282	57	TENS
1489.7	239	74	FAUL
1489.72	274	77	NORF
1489.79	257	5	JOIN
1489.89	285	31	JOIN
1489.9	142	44	TENS
1489.93	273	40	JOIN
1490.03	285	69	FRAC
1490.03	268	33	TENS
1490.15	231	83	CRAC
1490.47	221	90	CRAC
1490.65	239	78	CRAC
1490.76	265	59	TENS
1490.9	225	83	CRAC
1491.52	153	52	TENS
1491.56	232	81	FAUL
1491.61	241	63	FDEX
1491.66	232	63	FAUL
1491.8	243	80	FRAC
1491.88	147	46	TENS
1491.91	251	71	CRAC
1491.97	173	72	CRAC
1492.22	230	74	CRAC
1492.73	320	56	TENS
1492.8	194	74	CRAC
1493.19	47	67	FAUL
1493.4	227	61	REVF
1493.5	265	64	FRAC
1493.6	65	49	FRAC
1493.61	274	54	FAUL
1493.68	255	40	FRAC
1493.7	167	49	FRAC
1493.73	79	71	FRAC
1493.77	112	64	NORF
1493.77	300	75	FRAC
1493.79	270	54	TENS
1493.83	72	76	FRAC
1493.87	191	52	TENS
1493.88	211	39	TENS
1494.05	307	43	REVF
1494.08	315	55	FRAC
1494.1	328	53	FRAC
1494.24	134	62	FRAC
1494.24	108	57	FRAC
1494.28	109	62	FRAC
1494.32	95	63	FRAC
1494.52	56	69	TENS
1494.55	65	67	TENS
1494.7	192	50	FRAC
1494.79	314	58	TENS
1494.85	192	57	TENS
1494.92	86	64	FRAC
1495.03	92	66	FSEN
1495.15	283	86	TENS
1495.3	204	63	FRAC
1495.41	204	67	TENS
1495.42	299	72	TENS
1495.43	175	25	JOIN
1495.91	202	76	FRAC
1495.95	60	74	FRAC
1495.96	60	71	FRAC
1496.07	30	77	FRAC
1496.09	150	75	FRAC
1496.13	73	78	FRAC
1496.22	74	80	FRAC
1496.44	30	75	FRAC
1496.72	22	67	FRAC
1496.98	49	78	FRAC
1496.99	23	78	FRAC
1497.16	33	80	FRAC
1497.27	76	80	FRAC
1497.31	11	77	FRAC
1497.41	203	89	FRAC
1497.46	15	79	FAUL
1497.53	45	51	FAUL
1497.61	162	88	FAUL
1497.69	32	71	FRAC
1497.74	73	52	FRAC
1497.78	71	42	FAUL
1497.8	88	57	FAUL
1497.85	39	56	FAUL
1497.9	77	64	FRAC
1497.92	180	37	JOIN
1497.93	99	65	FRAC
1497.93	114	51	FRAC
1498.01	63	48	FRAC
1498.04	358	53	FAUL
1498.04	39	60	FRAC
1498.16	359	55	FRAC
1498.2	38	38	REVF
1498.22	16	47	FRAC
1498.27	17	78	FRAC
1498.28	44	77	TENS
1498.33	33	70	TENS
1498.35	21	60	FAUL
1498.43	17	48	FRAC
1498.44	31	75	FRAC
1498.47	17	50	NORF
1498.49	31	64	FRAC
1498.59	32	67	FRAC
1498.73	207	74	FRAC
1498.91	189	52	FRAC
1499.24	258	62	TENS
1499.29	60	90	FRAC
1499.48	202	80	TENS
1499.61	17	43	FAUL
1499.68	50	53	FRAC
1499.72	44	62	FRAC
1499.94	262	84	FRAC
1500.03	1	68	FRAC
1500.06	314	79	FRAC
1500.21	26	43	NORF
1500.32	21	51	FRAC
1500.44	43	51	FRAC
1500.67	131	77	FRAC
1500.74	29	43	FRAC
1500.75	48	44	FRAC
1500.77	37	52	FRAC
1500.78	55	51	FRAC
1500.84	22	34	FAUL
1500.85	272	87	TENS
1500.88	19	71	FRAC
1500.92	134	87	TENS
1500.93	39	38	FAUL
1500.96	32	59	FRAC
1501.14	23	67	TENS
1501.46	265	89	FRAC
1501.54	60	64	TENS
1502.49	45	66	NORF
1502.77	42	45	REVF
1502.78	223	67	REVF
1503.49	269	82	TENS
1503.71	282	69	TENS
1503.82	292	73	TENS
1503.93	279	56	FRAC
1504.03	284	69	TENS
1504.17	358	89	TENS
1504.18	283	67	TENS
1504.46	80	63	TENS
1504.87	29	74	TENS
1505.31	93	76	FAUL
1505.58	138	78	FRAC
1505.89	248	84	FRAC
1506.75	280	78	TENS
1506.76	330	75	TENS
1507.69	74	81	TENS
1508.06	354	79	FRAC
1508.67	354	77	FRAC
1508.83	196	79	TENS
1508.93	14	76	FRAC
1508.95	186	66	FRAC
1509.03	75	85	FAUL
1509.24	12	78	FAUL
1509.34	5	63	FAUL
1509.4	8	79	FAUL
1509.46	177	90	FRAC
1509.58	26	76	FRAC
1509.65	13	78	FRAC
1509.88	9	78	FAUL
1510.07	260	44	FRAC
1510.08	255	46	FRAC
1510.12	263	50	FRAC
1510.2	9	83	FAUL
1510.2	278	39	FRAC
1510.48	246	29	FRAC
1510.68	5	89	FAUL
1510.82	29	27	FRAC
1510.93	60	50	FAUL
1511.06	214	74	FRAC
1511.12	22	72	FRAC
1511.18	233	25	JOIN
1511.27	18	80	FAUL
1511.7	18	83	FRAC
1511.74	7	75	FRAC
1511.84	30	61	NORF
1512.06	358	73	FRAC
1512.07	274	27	FRAC
1512.15	259	24	FRAC
1512.19	4	80	FAUL
1512.4	178	86	FAUL
1512.73	15	79	FRAC
1512.74	59	81	FRAC
1512.81	15	75	FAUL
1512.81	62	57	FRAC
1512.85	69	61	FRAC
1512.98	15	75	FILO
1512.99	17	74	FRAC
1513.03	9	82	FAUL
1513.07	181	81	FDEX
1513.67	359	47	FAUL
1513.88	357	58	FRAC
1513.94	15	53	FRAC
1514.05	31	62	FRAC
1514.06	198	63	FRAC
1514.08	48	65	FRAC
1514.11	44	41	FRAC
1514.15	52	50	FRAC
1514.28	19	80	FAUL
1514.35	25	81	FAUL
1514.38	22	75	OPEN
1514.7	128	81	FRAC
1514.71	305	86	FRAC
1514.79	137	61	FRAC
1514.81	239	70	FRAC
1515.04	347	73	FRAC
1515.15	283	27	FRAC
1515.17	78	82	FAUL
1515.23	27	78	FRAC
1515.27	15	74	FAUL
1515.39	36	60	FAUL
1515.42	146	52	TENS
1515.62	264	74	FRAC
1515.7	93	80	FRAC
1515.75	107	81	FAUL
1515.98	156	46	FRAC
1516	252	60	FAUL
1516.04	62	62	FAUL
1516.07	73	77	FRAC
1516.38	265	37	FRAC
1516.44	309	47	FRAC
1516.47	156	46	FRAC
1516.61	191	14	JOIN
1516.64	225	19	JOIN
1516.76	77	84	FRAC
1516.81	107	70	FAUL
1516.81	194	22	FAUL
1516.82	264	87	TENS
1516.89	186	86	FRAC
1516.92	246	67	FAUL
1516.96	275	82	FRAC
1516.98	90	76	FAUL
1516.98	191	55	FAUL
1517.08	207	14	JOIN
1517.1	171	44	FRAC
1517.17	91	76	FRAC
1517.39	335	78	FRAC
1517.53	74	71	FAUL
1517.59	60	74	FAUL
1517.67	131	6	JOIN
1517.72	59	76	FAUL
1517.9	85	75	FAUL
1518.03	86	64	FRAC
1518.19	186	37	JOIN
1518.31	131	64	FRAC
1518.32	243	85	NORF
1518.44	73	85	FAUL
1518.55	155	20	TENS
1518.67	190	74	TENS
1518.74	90	63	TENS
1519.09	110	88	TENS
1519.22	77	76	NORF
1519.47	45	67	TENS
1519.49	112	70	FRAC
1519.55	191	65	TENS
1519.59	100	70	TENS
1519.62	147	21	JOIN
1519.79	144	74	TENS
1519.92	66	84	FRAC
1519.99	96	63	FRAC
1520.04	276	74	NORF
1520.07	99	63	NORF
1520.24	109	57	FRAC
1520.27	360	86	CRAC
1520.28	235	49	FRAC
1520.36	88	86	FDEX
1520.76	98	83	TENS
1520.92	80	50	REVF
1520.98	264	86	FAUL
1521.79	274	75	NORF
1522.15	85	81	FRAC
1522.27	139	77	TENS
1522.3	146	86	TENS
1522.58	10	77	TENS
1522.68	8	73	TENS
1523.18	7	79	FRAC
1523.24	15	71	TENS
1523.27	15	71	TENS
1523.31	6	75	TENS
1524.07	100	16	JOIN
1524.51	146	84	TENS
1524.54	320	80	TENS
1524.63	156	87	TENS
1524.68	138	33	JOIN
1524.73	158	89	TENS
1524.74	132	59	TENS
1524.81	318	78	TENS
1524.9	137	43	TENS
1525.04	101	13	JOIN
1525.19	178	22	JOIN
1525.6	158	69	TENS
1525.78	168	26	JOIN
1526.44	179	41	FRAC
1526.48	168	45	FRAC
1526.61	153	25	FRAC
1529.92	98	90	TENS
1530.26	269	90	FRAC
1530.78	135	41	FRAC
1531	143	38	FRAC
1531.09	144	47	TENS
1531.09	49	85	TENS
1531.37	310	78	TENS
1531.6	333	90	TENS
1533.16	243	84	TENS
1533.32	150	54	FRAC
1533.55	163	47	TENS
1533.64	157	42	TENS
1533.76	74	85	TENS
1533.8	70	81	TENS
1533.87	346	85	TENS
1533.87	323	86	TENS
1534.35	149	41	TENS
1535.97	356	86	TENS
1538.77	155	42	TENS
1539.08	147	49	TENS
1540.49	273	86	FRAC
1540.83	143	35	FRAC
1541.4	122	33	JOIN
1541.44	145	29	JOIN
1541.5	293	84	TENS
1542.21	164	38	JOIN
1542.23	152	47	FRAC
1542.63	138	53	FRAC
1542.69	166	48	FRAC
1542.72	306	75	TENS
1542.73	169	44	FRAC
1542.8	130	39	FRAC
1543.1	272	78	NORF
1543.24	147	49	FRAC
1544.13	158	32	JOIN
1545.3	235	64	CRAC
1545.5	226	52	CRAC
1547.82	86	72	TENS
1547.95	134	27	JOIN
1548.67	151	52	TENS
1549.15	91	83	TENS
1549.87	91	84	CRAC
1550.92	273	67	CRAC
1551.47	273	82	TENS
1552.13	163	40	JOIN
1552.14	151	66	FRAC
1553.88	97	54	TENS
1554.14	7	80	CRAC
1555.93	178	11	CRAC
1555.94	174	12	TENS
1555.97	154	10	TENS
1556	156	12	CRAC
1556.08	144	51	TENS
1556,99 LEP	261	39	JOIN
1559.89	162	10	FRAC
1559.9	74	6	TENS
1559.92	49	7	TENS
1559.94	165	13	FRAC
1565.26	303	84	CRAC
1565.46	335	8	JOIN
1565.63	120	67	TENS
1565.75	107	22	TENS
1566.81	109	66	TENS
1567.63	298	14	JOIN
1568.02	128	71	TENS
1572.13	124	69	NORF
1572.14	123	73	NORF
1572.18	93	51	FRAC
1574.34	271	5	CRAC
1574.45	117	28	CRAC
1574.69	128	4	JOIN
1574.74	203	30	JOIN
1575.75	111	75	NORF
1576.06	110	53	REVF
1576.11	109	48	NORF
1578.28	96	75	FRAC
1582.88	81	55	CRAC
1587.38	117	58	CRAC
1593.16	99	38	CRAC
1594.06	221	79	CRAC
1594.96	231	81	TENS
1595.36	98	42	TENS
1595.63	276	85	NORF
1595.68	104	52	FRAC
1595.88	4	87	TENS
1597.09	291	76	FAUL
1597.24	275	24	TENS
1597.38	36	72	FRAC
1597.4	295	81	FRAC
1597.46	105	86	FRAC
1597.67	113	86	FRAC
1597.72	287	86	FRAC
1597.75	277	64	FAUL
1597.81	133	74	FAUL
1597.84	101	79	FRAC
1598.31	295	81	FRAC
1598.33	287	75	FAUL
1598.53	99	70	TENS
1599	315	89	FRAC
1599.03	108	79	TENS
1599.27	107	83	TENS
1602.47	48	3	CRAC
1609.41	228	58	CRAC
1609.78	225	70	CRAC
1610.88	40	65	CRAC
1612.21	98	59	CRAC
1612.26	81	2	CRAC
1612.63	93	62	CRAC
1613.84	77	66	CRAC
1614.19	72	58	CRAC
1614.48	63	73	CRAC
1614.92	242	23	CRAC
1616.08	92	60	CRAC
1616.58	265	87	CRAC
1617.12	264	80	CRAC
1617.46	79	47	CRAC
1617.54	92	82	CRAC
1617.8	95	54	CRAC
1618.58	269	83	CRAC
1620.54	12	82	CRAC
1621.76	350	77	TENS
1623.54	2	82	TENS
1624.33	185	89	TENS
1625.02	12	73	TENS
1627.31	280	72	FAUL
1627.34	112	71	NORF
1627.62	291	80	CRAC
1627.71	119	76	FRAC
1628.06	111	79	CRAC
1628.83	262	54	CRAC
1628.91	279	68	TENS
1629.07	290	60	FAUL
1629.72	287	73	FRAC
1629.72	300	67	NORF
1629.84	94	70	TENS
1629.88	284	43	NORF
1629.89	100	74	TENS
1629.91	273	70	FRAC
1629.96	96	74	TENS
1630.1	326	47	REVF
1630.17	272	71	FRAC
1630.2	288	54	TENS
1630.34	280	32	REVF
1630.37	62	81	TENS
1630.41	235	41	FAUL
1630.47	273	45	TENS
1630.5	272	36	REVF
1630.5	100	53	TENS
1630.56	144	82	TENS
1630.67	312	55	TENS
1630.67	298	18	FAUL
1630.86	147	75	TENS
1630.92	314	61	TENS
1630.95	169	15	TENS
1630.97	295	18	FRAC
1630.99	271	43	TENS
1631.04	265	21	NORF
1631.05	107	45	TENS
1631.22	305	76	FAUL
1631.24	292	45	FAUL
1631.4	315	65	TENS
1631.55	5	49	FDEX
1631.68	341	37	FSEN
1631.68	280	66	TENS
1631.81	325	55	TENS
1631.83	312	55	TENS
1631.89	79	59	TENS
1631.93	353	48	TENS
1631.99	246	65	TENS
1632.01	336	87	TENS
1632.01	353	42	FAUL
1632.06	340	52	FAUL
1632.29	310	64	TENS
1632.38	299	50	TENS
1632.38	229	87	TENS
1632.41	310	21	FAUL
1632.41	100	71	TENS
1632.44	283	41	REVF
1632.5	357	21	FAUL
1632.51	107	55	TENS
1632.55	110	57	TENS
1632.59	2	41	TENS
1632.76	311	64	TENS
1632.84	286	83	TENS
1632.89	301	64	TENS
1632.92	315	54	TENS
1632.97	114	66	TENS
1633.12	298	50	FAUL
1633.22	334	22	FDEX
1633.39	323	45	FDEX
1633.46	154	68	TENS
1633.5	167	63	TENS
1633.61	101	68	TENS
1633.62	308	49	FSEN
1633.69	333	37	TENS
1633.7	114	86	TENS
1633.76	262	77	TENS
1633.78	115	70	FAUL
1633.81	35	87	FAUL
1633.96	295	73	TENS
1634.02	240	53	NORF
1634.09	268	53	FAUL
1634.11	276	49	TENS
1634.16	301	50	FAUL
1634.33	272	71	TENS
1634.39	294	76	TENS
1634.47	300	69	TENS
1634.56	263	52	TENS
1634.56	327	68	TENS
1634.75	301	77	TENS
1634.79	328	46	FRAC
1634.79	355	62	TENS
1634.83	348	42	FRAC
1634.9	322	33	FRAC
1634.92	312	61	FRAC
1634.93	271	41	FRAC
1635.02	207	90	REVF
1635.03	77	80	TENS
1635.05	22	36	FAUL
1635.05	325	68	TENS
1635.06	335	44	FDEX
1635.07	251	73	TENS
1635.13	315	71	FAUL
1635.15	325	63	FRAC
1635.16	263	88	FRAC
1635.17	315	35	TENS
1635.24	37	35	FRAC
1635.27	60	84	TENS
1635.29	338	31	FRAC
1635.31	344	32	NORF
1635.41	298	64	FAUL
1635.44	247	70	FAUL
1635.46	323	35	FRAC
1635.48	144	89	TENS
1635.57	94	72	TENS
1635.59	312	51	TENS
1635.59	45	28	FRAC
1635.62	310	50	TENS
1635.71	311	71	FAUL
1635.72	225	65	TENS
1635.75	185	69	TENS
1635.83	192	56	TENS
1635.85	258	56	FRAC
1635.85	288	50	FRAC
1636.04	73	73	FAUL
1636.04	245	75	TENS
1636.06	93	69	NORF
1636.2	101	62	FAUL
1636.21	57	84	TENS
1636.25	265	68	FRAC
1636.25	195	85	FRAC
1636.3	285	65	FRAC
1636.31	214	74	REVF
1636.33	71	63	TENS
1636.34	285	57	FRAC
1636.58	246	69	TENS
1636.66	276	55	FRAC
1636.69	296	62	FRAC
1636.8	266	65	TENS
1636.92	250	54	TENS
1636.98	239	70	TENS
1636.99	71	84	TENS
1637.01	193	45	TENS
1637.02	232	45	TENS
1637.06	299	57	NORF
1637.18	258	38	FAUL
1637.2	246	44	FAUL
1637.22	321	13	FRAC
1637.27	243	15	FRAC
1637.27	277	44	FRAC
1637.33	329	38	FRAC
1637.34	223	33	FRAC
1637.43	252	72	FAUL
1637.6	91	62	TENS
1637.61	277	46	FAUL
1637.9	234	66	TENS
1637.98	282	61	NORF
1638.18	271	63	NORF
1638.42	251	64	TENS
1638.53	251	68	TENS
1638.53	137	33	TENS
1638.61	261	64	TENS
1638.61	290	55	TENS
1638.66	284	48	FSEN
1638.68	159	60	TENS
1638.81	99	53	CRAC
1638.82	273	56	FRAC
1638.84	319	62	FRAC
1638.94	187	25	CRAC
1639.06	272	61	TENS
1639.11	291	56	TENS
1639.15	224	63	TENS
1639.22	233	61	TENS
1639.25	236	62	TENS
1639.31	267	21	TENS
1639.37	143	85	TENS
1639.65	11	88	TENS
1639.91	151	89	TENS
1640	297	73	TENS
1640.15	294	86	TENS
1640.16	262	82	FAUL
1640.29	73	80	TENS
1640.31	3	82	TENS
1640.4	60	89	FAUL
1640.43	285	84	FAUL
1640.58	269	84	FAUL
1640.77	88	77	FAUL
1641.14	263	82	TENS
1641.31	277	77	TENS
1641.44	222	29	JOIN
1641.57	70	76	FAUL
1641.6	282	78	FRAC
1641.61	251	63	FRAC
1641.64	272	72	FRAC
1641.69	237	84	FAUL
1641.71	352	85	TENS
1641.72	227	40	JOIN
1641.81	226	53	FRAC
1641.97	135	53	FRAC
1642.04	78	66	FAUL
1642.05	76	56	FAUL
1642.14	19	59	FAUL
1642.16	336	52	FRAC
1642.34	37	57	OPEN
1642.55	95	61	FRAC
1642.59	2	54	NORF
1642.67	104	51	NORF
1642.84	300	90	TENS
1643	272	81	TENS
1643.06	290	61	TENS
1643.14	291	69	TENS
1643.27	279	59	NORF
1643.29	314	88	TENS
1643.47	275	59	NORF
1643.69	20	51	FAUL
1644.11	119	33	NORF
1644.17	272	68	NORF
1644.23	89	57	FRAC
1644.27	110	69	TENS
1644.58	100	60	TENS
1644.59	68	54	TENS
1644.67	270	64	FAUL
1645.37	286	53	FAUL
1645.66	55	88	NORF
1646.23	125	81	NORF
1646.28	278	78	FAUL
1646.35	90	76	FAUL
1646.45	16	59	FAUL
1646.63	87	36	TENS
1646.65	115	66	REVF
1646.87	113	81	FAUL
1646.91	15	67	FAUL
1646.98	1	53	FAUL
1647.07	302	74	FAUL
1647.16	114	52	NORF
1647.43	86	75	TENS
1647.43	200	49	FAUL
1647.44	120	74	TENS
1647.45	260	56	FAUL
1647.45	252	30	REVF
1647.51	48	51	TENS
1647.66	42	61	TENS
1647.67	269	31	FRAC
1647.77	41	36	TENS
1647.8	57	31	TENS
1647.81	18	45	TENS
1647.82	281	29	REVF
1647.85	298	46	FRAC
1647.86	123	75	FRAC
1647.88	319	51	FRAC
1647.9	148	48	FRAC
1647.9	245	18	FRAC
1647.92	200	21	FRAC
1647.96	10	52	TENS
1648	354	85	TENS
1648.01	212	25	FRAC
1648.04	235	38	FRAC
1648.11	54	43	TENS
1648.13	251	48	TENS
1648.14	89	29	TENS
1648.22	288	15	NORF
1648.25	287	68	NORF
1648.34	297	61	FRAC
1648.36	282	48	FRAC
1648.43	358	88	TENS
1648.46	103	64	FRAC
1648.53	343	82	FRAC
1648.55	299	55	FRAC
1648.56	73	66	FRAC
1648.6	358	77	TENS
1648.68	65	48	TENS
1648.69	126	71	FAUL
1648.7	313	74	FRAC
1648.76	175	74	TENS
1648.78	246	41	FRAC
1648.8	27	84	TENS
1648.84	283	77	FAUL
1648.99	279	26	FAUL
1649.16	116	82	FAUL
1649.2	277	57	FAUL
1649.21	309	61	FAUL
1649.29	291	16	FAUL
1649.3	289	23	FRAC
1649.34	300	54	FAUL
1649.35	335	39	FRAC
1649.39	271	21	FRAC
1649.43	276	8	NORF
1649.48	226	55	FAUL
1649.49	73	83	FRAC
1649.5	287	5	FRAC
1649.52	193	43	FRAC
1649.52	359	61	FRAC
1649.54	197	66	FAUL
1649.56	224	24	NORF
1649.58	2	60	FRAC
1649.58	207	48	TENS
1649.63	119	12	NORF
1649.67	244	58	FRAC
1649.69	293	18	FAUL
1649.73	137	42	FAUL
1649.73	137	72	TENS
1649.74	307	54	TENS
1649.76	333	49	FAUL
1649.79	315	62	TENS
1649.84	192	82	TENS
1649.86	276	62	FRAC
1649.86	172	7	FAUL
1649.88	323	50	TENS
1649.92	276	16	FRAC
1649.95	150	22	NORF
1650	232	33	FRAC
1650.04	350	19	FAUL
1650.13	265	68	TENS
1650.16	328	47	NORF
1650.18	323	33	FRAC
1650.19	81	62	TENS
1650.21	320	42	FRAC
1650.26	300	42	FRAC
1650.3	39	44	NORF
1650.31	115	67	TENS
1650.4	297	70	FRAC
1650.42	291	57	TENS
1650.44	34	13	NORF
1650.46	310	28	FRAC
1650.49	254	22	FRAC
1650.54	287	11	REVF
1650.55	281	55	TENS
1650.6	323	15	REVF
1650.65	157	80	FRAC
1650.7	166	50	FAUL
1650.71	188	84	TENS
1650.73	307	54	FRAC
1650.75	58	25	FRAC
1650.9	145	18	FAUL
1650.9	353	28	FRAC
1650.97	310	59	TENS
1651	229	75	TENS
1651.07	341	23	REVF
1651.14	285	27	FRAC
1651.16	255	20	FRAC
1651.23	193	31	FAUL
1651.28	247	41	FAUL
1651.3	249	41	FAUL
1651.32	248	48	FAUL
1651.34	253	41	NORF
1651.38	278	57	FAUL
1651.42	10	76	FRAC
1651.5	250	69	FRAC
1651.7	220	82	FRAC
1651.75	142	66	TENS
1651.83	225	21	NORF
1652.25	106	51	FAUL
1652.42	198	38	FAUL
1652.44	234	37	FRAC
1652.47	226	47	FRAC
1652.52	104	68	FRAC
1652.54	221	52	FRAC
1652.62	138	78	FRAC
1652.62	105	82	TENS
1652.69	48	66	FRAC
1652.84	111	52	CRAC
1652.86	357	71	FRAC
1652.88	91	59	CRAC
1652.88	190	37	CRAC
1653.2	321	71	TENS
1653.23	110	74	TENS
1653.24	183	84	TENS
1653.37	168	68	FRAC
1653.41	234	61	FRAC
1653.44	103	75	TENS
1653.44	245	43	FRAC
1653.64	92	66	TENS
1653.7	86	68	TENS
1653.85	231	88	FAUL
1653.93	232	84	FAUL
1654.08	67	49	TENS
1654.11	65	39	TENS
1654.19	75	57	TENS
1654.33	79	71	TENS
1654.46	77	46	TENS
1655.05	105	63	FAUL
1655.05	305	26	FRAC
1656.03	225	18	JOIN
1656.07	232	34	JOIN
1656.16	227	57	NORF
1656.17	234	62	FAUL
1656.27	217	62	TENS
1656.27	138	48	TENS
1656.33	43	38	TENS
1656.34	55	63	TENS
1656.37	224	39	TENS
1656.42	48	21	REVF
1656.46	257	85	FAUL
1656.48	88	43	TENS
1656.54	175	85	TENS
1656.56	223	67	FAUL
1656.64	319	83	TENS
1656.66	212	83	TENS
1656.79	128	73	TENS
1656.8	223	73	TENS
1656.87	221	74	TENS
1656.92	334	89	TENS
1657.03	217	70	TENS
1657.08	350	79	TENS
1657.14	89	31	TENS
1657.17	244	65	TENS
1657.25	233	59	FAUL
1657.3	235	71	FRAC
1657.36	225	68	TENS
1657.41	188	75	TENS
1657.44	157	80	TENS
1657.52	116	89	FRAC
1657.52	252	84	TENS
1657.55	149	79	TENS
1657.55	182	86	TENS
1657.62	90	74	TENS
1657.67	0	73	NORF
1657.73	314	74	NORF
1658.11	263	84	TENS
1658.47	348	87	TENS
1658.51	127	48	TENS
1658.65	262	89	TENS
1658.75	237	80	TENS
1659.41	88	80	TENS
1659.67	75	79	TENS
1659.86	301	87	TENS
1660.64	35	11	JOIN
1660.66	44	15	JOIN
1661.09	78	56	TENS
1661.12	266	87	NORF
1661.96	208	12	CRAC
1662.34	164	85	TENS
1665.72	30	87	TENS
1665.78	21	87	TENS
1668.43	79	56	TENS
1668.66	90	51	TENS
1668.81	82	50	TENS
1669.07	86	57	TENS
1669.1	83	55	TENS
1669.52	84	52	TENS
1669.66	82	58	TENS
1669.7	113	53	TENS
1670.78	273	82	TENS
1670.83	88	56	TENS
1670.87	285	73	TENS
1670.99	251	36	JOIN
1671.02	267	63	TENS
1671.29	235	85	TENS
1671.33	92	52	TENS
1671.43	95	52	TENS
1671.47	96	61	TENS
1671.87	275	74	TENS
1671.94	87	55	TENS
1671.99	87	57	CRAC
1672.03	93	45	CRAC
1672.12	91	54	TENS
1672.12	283	76	TENS
1672.27	87	57	TENS
1672.52	257	81	TENS
1672.61	251	76	TENS
1672.71	262	70	TENS
1672.72	82	48	TENS
1672.73	272	85	TENS
1672.8	87	55	TENS
1673.08	269	79	TENS
1673.16	275	78	TENS
1673.18	253	73	TENS
1673.24	328	73	TENS
1673.35	285	49	TENS
1673.39	81	40	TENS
1673.39	331	75	TENS
1673.39	232	16	TENS
1673.48	238	23	TENS
1673.72	92	57	FAUL
1673.79	278	51	TENS
1673.9	284	47	TENS
1674.2	51	62	FAUL
1674.26	195	70	TENS
1674.27	41	46	FAUL
1674.31	29	60	NORF
1674.49	34	73	FAUL
1674.51	251	38	FAUL
1674.54	283	42	FAUL
1674.55	263	33	FAUL
1674.58	43	65	FAUL
1674.63	229	69	FAUL
1674.71	295	45	FAUL
1674.71	38	64	FAUL
1674.92	295	42	NORF
1675.1	236	50	FAUL
1675.1	91	81	FAUL
1675.11	244	32	FRAC
1675.14	257	50	FRAC
1675.17	14	85	TENS
1675.19	280	50	FRAC
1675.2	21	24	NORF
1675.24	27	25	FAUL
1675.33	7	45	FAUL
1675.33	280	47	FAUL
1675.39	278	17	TENS
1675.44	258	52	TENS
1675.49	248	67	TENS
1675.54	266	53	TENS
1675.68	220	65	FAUL
1675.68	254	59	NORF
1675.69	291	31	TENS
1675.72	327	72	TENS
1675.78	164	5	NORF
1675.96	59	58	NORF
1676.09	42	59	TENS
1676.14	219	52	TENS
1676.24	230	59	TENS
1676.25	259	57	TENS
1676.28	260	60	TENS
1676.28	284	52	TENS
1676.39	61	26	TENS
1676.41	302	74	TENS
1676.42	48	50	TENS
1676.45	56	48	FDEX
1676.5	38	43	TENS
1676.66	68	73	TENS
1676.77	221	62	TENS
1676.82	201	30	TENS
1676.84	233	29	TENS
1677.58	307	57	TENS
1677.77	93	58	TENS
1677.81	62	78	TENS
1678.18	52	65	TENS
1678.27	50	57	FAUL
1678.35	268	58	TENS
1678.39	60	74	TENS
1680.04	333	70	TENS
1680.04	274	40	CRAC
1680.07	32	47	REVF
1680.28	47	63	FAUL
1680.77	135	69	TENS
1680.84	126	90	TENS
1684.58	6	80	TENS
1685.08	23	74	TENS
1685.38	349	52	TENS
1685.47	188	61	TENS
1685.54	71	60	TENS
1686.22	105	49	TENS
1686.28	352	14	JOIN
1686.3	231	54	FRAC
1686.93	325	25	JOIN
1687.48	36	59	TENS
1687.58	44	48	TENS
1688.35	239	32	TENS
1695.21	321	32	JOIN
1695.21	141	2	JOIN
1700.3	237	79	FAUL
1700.6	238	86	FAUL
1703.37	83	64	TENS
1703.49	84	61	FAUL
1703.6	81	56	NORF
1703.69	51	68	FAUL
1703.73	73	75	FAUL
1703.76	73	61	FAUL
1703.91	309	83	TENS
1703.93	287	67	FAUL
1703.94	60	55	FAUL
1703.96	85	53	FAUL
1703.99	88	60	FAUL
1704.11	75	55	REVF
1704.16	79	47	FAUL
1704.26	72	44	FAUL
1704.3	68	60	FAUL
1704.3	60	47	NORF
1704.33	250	56	TENS
1704.38	78	53	FSEN
1704.49	81	51	NORF
1704.54	341	75	TENS
1704.59	77	43	FAUL
1704.64	83	62	NORF
1704.76	12	79	TENS
1704.77	76	62	FAUL
1704.87	72	64	FAUL
1705.03	4	81	TENS
1705.19	59	81	TENS
1705.37	73	61	TENS
1705.59	87	69	TENS
1705.59	251	88	TENS
1705.89	77	67	TENS
1705.9	306	64	TENS
1705.93	286	72	TENS
1705.94	161	7	JOIN
1705.97	211	62	TENS
1705.99	80	66	TENS
1705.99	88	58	TENS
1706.04	77	70	TENS
1706.05	313	82	TENS
1706.11	74	71	TENS
1706.14	32	50	TENS
1706.14	330	67	TENS
1706.16	56	82	TENS
1706.17	324	66	TENS
1706.39	132	79	TENS
1706.44	69	67	TENS
1706.46	260	86	TENS
1706.48	266	71	TENS
1706.54	260	65	TENS
1706.86	63	74	TENS
1706.96	254	68	FAUL
1707.59	114	84	TENS
1707.9	353	88	TENS
1707.98	193	77	TENS
1708.04	354	75	TENS
1708.1	80	63	TENS
1708.11	190	72	TENS
1708.2	213	86	TENS
1708.24	38	33	TENS
1708.25	338	28	TENS
1708.33	298	83	TENS
1708.44	313	73	TENS
1708.46	6	74	TENS
1708.47	60	55	TENS
1708.51	64	57	TENS
1708.56	73	63	TENS
1708.56	45	61	TENS
1708.56	184	72	TENS
1708.61	65	48	TENS
1708.67	99	50	TENS
1708.72	106	51	TENS
1708.75	88	38	FAUL
1708.75	61	73	TENS
1708.79	86	72	TENS
1708.82	101	61	TENS
1709.02	78	56	FAUL
1709.05	87	78	FRAC
1709.16	77	57	TENS
1709.19	93	71	FRAC
1709.2	308	87	FRAC
1709.44	85	44	FRAC
1709.46	94	40	TENS
1709.47	106	53	TENS
1709.51	83	48	TENS
1709.6	116	59	TENS
1709.67	337	70	TENS
1709.74	75	50	FAUL
1709.8	244	74	FRAC
1709.84	235	79	FRAC
1709.95	75	39	FAUL
1710.2	317	85	TENS
1710.21	215	87	TENS
1710.27	335	82	TENS
1710.46	226	78	TENS
1710.55	206	78	TENS
1710.72	224	85	TENS
1711.52	262	78	TENS
1712.51	272	69	FAUL
1714.56	326	71	TENS
1716.53	245	62	TENS
1716.53	260	58	TENS
1718.23	234	72	TENS
1718.45	285	58	TENS
1720.01	212	22	FAUL
1723.11	210	69	FRAC
1725.91	297	48	FRAC
1728.36	221	51	FRAC
1728.43	200	63	FRAC
1731.39	227	70	FRAC
1731.4	171	77	FRAC
1731.52	177	57	FRAC
1732.51	312	42	NORF
1733.15	333	50	FRAC
1734.88	171	50	FRAC
1736.04	228	28	FRAC
1736.21	200	34	FRAC
1739.24	165	48	TENS
1739.31	153	43	TENS
1740.91	160	32	TENS
1743.29	154	37	FRAC
1743.44	12	43	TENS
1743.69	344	40	TENS
1743.81	91	44	FSEN
1743.86	318	35	TENS
1744.04	252	51	FRAC
1744.05	256	56	FRAC
1744.33	298	46	TENS
1744.44	316	86	CRAC
1744.85	283	28	TENS
1745.47	33	74	TENS
1745.95	290	42	TENS
1745.97	27	79	CRAC
1746.49	273	30	TENS
1746.86	88	86	TENS
1747.47	38	78	CRAC
1748.55	258	53	TENS
1748.61	268	40	TENS
1748.68	305	31	TENS
1748.77	326	27	TENS
1749.1	252	21	JOIN
1752.42	283	52	TENS
1752.43	273	49	TENS
1752.45	277	43	TENS
1752.48	276	44	TENS
1753.07	286	45	TENS
1754.05	187	67	CRAC
1759.42	272	57	TENS
1759.44	274	56	TENS
1759.46	260	50	TENS
1760.16	259	51	TENS
1760.27	76	68	TENS
1760.3	280	69	TENS
1760.34	261	59	TENS
1760.48	251	49	TENS
1760.53	246	48	TENS
1760.59	250	41	TENS
1761.35	231	53	TENS
1761.38	122	68	TENS
1762.1	263	74	TENS
1762.18	240	61	TENS
1762.22	269	60	TENS
1762.84	267	50	TENS
1762.86	243	65	TENS
1762.9	319	49	TENS
1762.93	282	59	TENS
1763.05	315	60	TENS
1763.05	309	55	TENS
1763.07	313	57	TENS
1763.12	313	63	TENS
1763.13	306	64	TENS
1763.13	303	57	TENS
1763.16	305	60	TENS
1763.17	308	59	TENS
1763.18	307	58	TENS
1763.22	300	69	TENS
1763.27	321	69	TENS
1763.28	315	69	TENS
1763.38	303	57	TENS
1763.4	272	46	TENS
1763.41	217	68	TENS
1763.42	334	61	TENS
1763.54	318	71	TENS
1763.56	318	68	REVF
1763.56	245	82	TENS
1763.9	308	62	TENS
1763.9	309	68	CRAC
1764.11	336	73	TENS
1764.15	337	72	TENS
1764.15	322	63	CRAC
1764.17	338	74	TENS
1764.25	304	45	TENS
1764.81	280	62	CRAC
1764.88	283	61	CRAC
1764.9	296	59	CRAC
1764.94	280	55	CRAC
1765.04	276	46	TENS
1765.04	291	41	TENS
1765.22	265	30	TENS
1765.35	291	68	TENS
1765.49	289	86	TENS
1765.99	104	88	TENS
1769.35	308	26	CRAC
1769.42	312	33	CRAC
1769.53	309	36	TENS
1769.58	117	77	TENS
1770.37	301	55	CRAC
1770.45	121	41	CRAC
1770.49	111	47	CRAC
1771.59	112	83	OPEN
1771.85	108	60	FAUL
1771.93	86	55	FAUL
1771.94	133	82	TENS
1771.95	91	46	FAUL
1772.02	102	72	FAUL
1772.02	65	60	FAUL
1772.04	90	58	FAUL
1772.07	117	63	FAUL
1772.16	107	58	NORF
1772.27	77	81	OPEN
1772.3	110	66	FRAC
1772.46	110	70	FRAC
1772.91	293	50	TENS
1772.95	53	82	TENS
1773	56	85	TENS
1773.1	105	62	TENS
1773.16	120	67	NORF
1773.18	185	84	TENS
1773.23	108	67	NORF
1773.28	104	68	TENS
1776.55	269	81	TENS
1777.76	296	55	TENS
1783.16	24	74	CRAC
1784.03	278	56	TENS
1803.07	187	32	CRAC
1806.53	87	47	FRAC
1806.94	323	18	CRAC
1807.53	225	42	CRAC
1807.72	102	51	NORF
1807.95	217	49	TENS
1807.98	215	55	TENS
1808.01	200	50	TENS
1808.28	109	70	FAUL
1808.31	107	80	FAUL
1808.36	98	64	NORF
1808.39	64	57	FAUL
1808.41	132	40	FAUL
1808.45	123	48	NORF
1808.67	128	72	NORF
1808.87	252	82	FAUL
1808.97	269	60	FAUL
1809.04	324	50	FAUL
1809.21	288	48	FAUL
1809.22	262	52	FAUL
1809.23	259	66	FRAC
1809.31	103	78	FILO
1809.32	150	87	FAUL
1809.39	274	61	FRAC
1809.47	353	77	FAUL
1809.49	106	69	NORF
1809.52	242	68	FAUL
1809.86	243	36	JOIN
1809.92	243	29	JOIN
1809.98	320	58	TENS
1810.03	314	67	TENS
1810.04	79	65	TENS
1810.05	301	59	CRAC
1810.07	325	56	TENS
1810.1	224	76	CRAC
1810.11	30	79	FRAC
1810.18	150	33	JOIN
1810.48	172	56	CRAC
1810.49	327	51	CRAC
1810.59	278	29	JOIN
1810.67	282	70	TENS
1810.96	53	80	FRAC
1810.97	318	64	CRAC
1811.08	270	73	CRAC
1811.22	302	69	CRAC
1811.29	286	73	TENS
1811.99	302	84	TENS
1812.16	324	60	CRAC
1812.6	301	69	CRAC
1812.79	270	62	TENS
1813.28	246	66	CRAC
1813.88	84	61	FAUL
1814.06	89	49	FAUL
1814.13	318	47	FRAC
1814.13	345	89	CRAC
1814.16	342	78	TENS
1814.36	47	89	CRAC
1814.37	254	88	CRAC
1814.46	47	65	TENS
1814.48	108	68	TENS
1814.5	10	67	TENS
1814.51	98	62	TENS
1814.54	92	53	TENS
1814.58	228	86	FRAC
1814.64	18	73	TENS
1814.67	297	69	FRAC
1814.76	298	40	CRAC
1814.86	225	88	FRAC
1814.89	304	72	TENS
1814.91	249	47	TENS
1814.91	253	46	TENS
1814.99	210	80	TENS
1815.1	295	87	FRAC
1815.16	315	75	FRAC
1815.2	227	84	TENS
1815.26	302	63	TENS
1815.41	266	65	TENS
1815.58	21	79	CRAC
1815.72	224	9	CRAC
1815.74	305	78	TENS
1816.47	230	46	CRAC
1817.05	276	52	TENS
1821.54	130	49	FRAC
1821.99	95	42	CRAC
1822.97	112	49	FRAC
1823.46	105	70	TENS
1825.02	115	46	TENS
1825.52	99	40	CRAC
1826.13	132	51	TENS
1827.96	300	44	TENS
1829.32	360	14	TENS
1829.34	16	30	CRAC
1829.47	65	74	TENS
1829.49	289	65	TENS
1829.76	88	74	TENS
1830.22	323	64	TENS
1830.49	296	60	TENS
1830.72	98	59	TENS
1830.82	314	30	TENS
1830.9	102	60	TENS
1831.2	94	65	TENS
1831.25	104	69	TENS
1831.29	108	64	NORF
1831.46	317	86	TENS
1831.61	68	82	FRAC
1831.73	221	87	TENS
1831.75	207	89	TENS
1831.87	20	75	TENS
1831.89	278	63	FAUL
1832	95	68	NORF
1832.05	245	45	FAUL
1832.08	321	47	FRAC
1832.1	96	23	NORF
1832.18	304	15	FRAC
1832.29	21	62	TENS
1832.31	108	57	FRAC
1832.33	258	75	FRAC
1832.35	262	50	FRAC
1832.37	250	69	FRAC
1832.41	112	56	FAUL
1832.48	119	38	FAUL
1832.5	119	36	FRAC
1832.57	269	70	FRAC
1832.61	49	79	TENS
1832.61	101	34	TENS
1832.67	281	74	TENS
1832.86	150	73	TENS
1832.87	300	69	TENS
1832.99	100	76	TENS
1833.01	329	17	TENS
1833.05	164	52	TENS
1833.07	142	31	TENS
1833.08	304	34	TENS
1833.17	82	55	NORF
1833.18	326	81	FRAC
1833.33	319	46	TENS
1833.37	245	87	TENS
1833.38	63	77	TENS
1833.39	313	76	FRAC
1833.45	350	40	TENS
[truncated: 1,020 more rows]

## Sheet: Outcrops-Quarries_Sandstones
Site	Type	Direction	Dip
Annaberg	Fracture	296	83
Annaberg	Fracture	48	85
Annaberg	Fracture	132	88
Annaberg	Fracture	226	87
Annaberg	Fracture	135	85
Annaberg	Fracture	42	81
Annaberg	Fracture	119	88
Annaberg	Fracture	42	82
Annaberg	Fracture	118	84
Annaberg	Fracture	42	90
Annaberg	Fracture	49	88
Annaberg	Fracture	297	86
Annaberg	Fracture	123	77
Annaberg	Fracture	235	88
Annaberg	Fracture zone	296	88
Annaberg	Fracture zone	305	84
Annaberg	Fracture	255	75
Annaberg	Fracture zone	77	83
Annaberg	Fracture zone	331	85
Annaberg	Fracture	257	80
Bad Dürkheim	Fracture	104	86
Bad Dürkheim	Fracture	190	88
Bad Dürkheim	Fracture	111	87
Bad Dürkheim	Fracture	16	89
Bad Dürkheim	Fracture	275	88
Bad Dürkheim	Fracture	163	72
Bad Dürkheim	Fracture	16	90
Bad Dürkheim	Fracture	142	60
Bad Dürkheim	Fracture	297	85
Bad Dürkheim	Fracture	13	88
Bad Dürkheim	Fracture	44	84
Bad Dürkheim	Fracture	296	88
Bad Dürkheim	Fracture	79	80
Bad Dürkheim	Fracture	293	87
Bad Dürkheim	Fracture	222	80
Bad Dürkheim	Fracture	206	84
Bad Dürkheim	Fracture	359	89
Bad Dürkheim	Fracture	75	80
Bad Dürkheim	Fracture	233	82
Bad Dürkheim	Fracture	318	89
Bad Dürkheim	Fracture	296	87
Bad Dürkheim	Fracture	294	85
Bad Dürkheim	Fracture	212	84
Bad Dürkheim	Fracture	299	88
Bad Dürkheim	Fracture	28	89
Bad Dürkheim	Fracture	31	89
Bad Dürkheim	Fracture	308	87
Bad Dürkheim	Fracture	48	79
Bad Dürkheim	Fracture	212	79
Bad Dürkheim	Fracture	302	89
Bad Dürkheim	Fracture	21	70
Bad Dürkheim	Fracture	289	86
Bad Dürkheim	Fracture	25	82
Walhambach	Fracture	115	90
Walhambach	Fracture	200	85
Walhambach	Fracture	190	76
Walhambach	Fracture	146	84
Walhambach	Fracture	120	90
Walhambach	Fracture	357	78
Walhambach	Fracture	379	77
Walhambach	Fracture	370	56
Walhambach	Fracture	191	61
Walhambach	Fracture	197	73
Walhambach	Fracture	114	90
Walhambach	Fracture	266	86
Walhambach	Fracture	116	90
Walhambach	Fracture	12	90
Walhambach	Fracture	396	82
Walhambach	Fracture	152	90
Walhambach	Fracture	172	0
Walhambach	Fracture	27	90
Walhambach	Fracture	107	83
Walhambach	Fracture	101	77
Walhambach	Fracture	356	88
Walhambach	Fracture	11	90
Walhambach	Fracture	213	82
Walhambach	Fracture	398	89
Walhambach	Fracture	382	44
Walhambach	Fracture	386	55
Walhambach	Fracture	189	87
Walhambach	Fracture	374	70
Walhambach	Fracture	400	58
Walhambach	Fracture	266	76
Cleebourg	Fracture	130	82
Cleebourg	Fracture	142	82
Cleebourg	Fracture	153	84
Cleebourg	Fracture	152	84
Cleebourg	Fracture	355	72
Cleebourg	Fracture	117	86
Cleebourg	Fracture	300	71
Cleebourg	Fracture	350	76
Cleebourg	Fracture	300	66
Cleebourg	Fracture	102	83
Cleebourg	Fracture	88	90
Cleebourg	Fracture	292	76
Cleebourg	Fracture	110	88
Cleebourg	Fracture	116	90
Cleebourg	Fracture	272	79
Cleebourg	Fracture	278	77
Cleebourg	Fracture	286	44
Cleebourg	Fracture	294	67
Cleebourg	Fracture	153	72
Cleebourg	Fracture	308	54
Cleebourg	Fracture	318	70
Cleebourg	Fracture	333	74
Cleebourg	Fracture	314	72
Cleebourg	Fracture	317	80
Cleebourg	Fracture	137	90
Cleebourg	Fracture	300	81
Cleebourg	Fracture	290	74
Cleebourg	Fracture	167	70
Cleebourg	Fracture	290	71
Cleebourg	Fracture	300	77
Cleebourg	Fracture	302	80
Cleebourg	Fracture	297	63
Cleebourg	Fracture	304	78
Cleebourg	Fracture	300	74
Cleebourg	Fracture	308	75
Cleebourg	Fracture	220	89
Cleebourg	Fracture	130	72
Cleebourg	Fracture	38	78
Cleebourg	Fracture	300	79
Cleebourg	Fracture	77	58
Cleebourg	Fracture	72	65
Cleebourg	Fracture	126	73
Cleebourg	Fracture	110	64
Cleebourg	Fracture	207	83
Cleebourg	Fracture	318	76
Cleebourg	Fracture	290	77
Cleebourg	Fracture	101	82
Cleebourg	Fracture	106	79
Cleebourg	Fracture	282	53
Cleebourg	Fracture	100	85
Cleebourg	Fracture	104	83
Cleebourg	Fracture	110	81
Cleebourg	Fracture	282	62
Cleebourg	Fracture	356	62
Cleebourg	Fracture	280	75
Cleebourg	Fracture	5	76
Cleebourg	Fracture	77	73
Cleebourg	Fracture	275	68
Cleebourg	Fracture	278	63
Cleebourg	Fracture	278	87
Cleebourg	Fracture	273	81
Cleebourg	Fracture	274	71
Cleebourg	Fracture	270	64
Cleebourg	Fracture	96	89
Cleebourg	Fracture	112	88
Cleebourg	Fracture	3	90
Cleebourg	Fracture	283	79
Cleebourg	Fracture	127	87
Cleebourg	Fracture	298	69
Cleebourg	Fracture	307	83
Cleebourg	Fracture	338	57
Cleebourg	Fracture	345	56
Cleebourg	Fracture	82	78
Cleebourg	Fracture	95	82
Cleebourg	Fracture	54	54
Cleebourg	Fracture	97	54
Cleebourg	Fracture	84	88
Cleebourg	Fracture	173	86
Cleebourg	Fracture	92	89
Cleebourg	Fracture	110	90
Cleebourg	Fracture	314	86
Cleebourg	Fracture	112	85
Cleebourg	Fracture	126	85
Cleebourg	Fracture	90	88
Cleebourg	Fracture	132	90
Cleebourg	Fracture	128	90
Cleebourg	Fracture	130	90
Cleebourg	Fracture	133	89
Cleebourg	Fracture	140	88
Cleebourg	Fracture	353	64
Cleebourg	Fracture	334	82
Cleebourg	Fracture	342	54
Cleebourg	Fracture	298	72
Cleebourg	Fracture	305	79
Cleebourg	Fracture	298	76
Cleebourg	Fracture	315	73
Cleebourg	Fracture	303	74
Cleebourg	Fracture	287	82
Cleebourg	Fracture	307	65
Cleebourg	Fracture	308	70
Cleebourg	Fracture	285	84
Cleebourg	Fracture	343	73
Cleebourg	Fracture	343	80
Cleebourg	Fracture	315	62
Cleebourg	Fracture	88	80
Cleebourg	Fracture	314	56
Cleebourg	Fracture	318	62
Cleebourg	Fracture	130	37
Cleebourg	Fracture	355	63
Cleebourg	Fracture	356	57
Cleebourg	Fracture	109	82
Cleebourg	Fracture	338	83
Cleebourg	Fracture	339	85
Cleebourg	Fracture	342	83
Cleebourg	Fracture	325	75
Cleebourg	Fracture	320	77
Cleebourg	Fracture	340	83
Cleebourg	Fracture	333	65
Cleebourg	Fracture	340	59
Cleebourg	Fracture	350	58
Cleebourg	Fracture	343	64
Cleebourg	Fracture	334	57
Cleebourg	Fracture	240	90
Cleebourg	Fracture	242	90
Cleebourg	Fracture	146	90
Cleebourg	Fracture	153
Cleebourg	Fracture	215
Cleebourg	Fracture	218
Cleebourg	Fracture	213
Cleebourg	Fracture	210
Cleebourg	Fracture	223
Cleebourg	Fracture	215
Cleebourg	Fracture	199
Cleebourg	Fracture	115
Cleebourg	Fracture	162
Cleebourg	Fracture	165
Cleebourg	Fracture	212
Cleebourg	Fracture	205
Cleebourg	Fracture	158
Cleebourg	Fracture	154
Cleebourg	Fracture	116
Cleebourg	Fracture	211
Cleebourg	Fracture	222
Cleebourg	Fracture	205
Cleebourg	Fracture	155
Cleebourg	Fracture	216
Cleebourg	Fracture	115
Cleebourg	Fracture	160
Cleebourg	Fracture	203
Cleebourg	Fracture	146
Cleebourg	Fracture	150
Cleebourg	Fracture	208
Cleebourg	Fracture	210
Cleebourg	Fracture	212
Cleebourg	Fracture	147
Cleebourg	Fracture	162
Cleebourg	Fracture	210
Cleebourg	Fracture	213
Cleebourg	Fracture	160
Cleebourg	Fracture	148
Cleebourg	Fracture	214
Cleebourg	Fracture	210
Cleebourg	Fracture	212
Cleebourg	Fracture	130
Cleebourg	Fracture	210
Cleebourg	Fracture	214
Cleebourg	Fracture	197
Cleebourg	Fracture	210
Cleebourg	Fracture	215
Cleebourg	Fracture	213
Cleebourg	Fracture	218
Cleebourg	Fracture	172
Cleebourg	Fracture	145
Cleebourg	Fracture	183
Cleebourg	Fracture	235
Cleebourg	Fracture	243
Cleebourg	Fracture	228
Cleebourg	Fracture	250
Cleebourg	Fracture	248
Cleebourg	Fracture	164
Cleebourg	Fracture	242
Cleebourg	Fracture	145
Cleebourg	Fracture	250
Cleebourg	Fracture	246
Cleebourg	Fracture	243
Cleebourg	Fracture	145
Cleebourg	Fracture	178
Cleebourg	Fracture	173
Cleebourg	Fracture	244
Cleebourg	Fracture	255
Cleebourg	Fracture	170
Cleebourg	Fracture	180
Cleebourg	Fracture	175
Cleebourg	Fracture	190
Cleebourg	Fracture	104
Cleebourg	Fracture	200
Cleebourg	Fracture	170
Cleebourg	Fracture	248
Cleebourg	Fracture	210
Cleebourg	Fracture	174
Cleebourg	Fracture	270
Cleebourg	Fracture	259
Cleebourg	Fracture	264
Rothbach	Fracture	40	70
Rothbach	Fracture	52	65
Rothbach	Fracture	140	75
Rothbach	Fracture	40	80
Rothbach	Fracture	132	72
Rothbach	Fracture zone	150	85
Rothbach	Cataclased zone	203	68
Rothbach	Fracture	172
Rothbach	Fracture	127
Rothbach	Fracture zone	128	79
Rothbach	Fracture	227	88
Rothbach	Fracture	335	78
Rothbach	Fracture	80	60
Rothbach	Fracture	80	89
Rothbach	Open plan	5	8
Rothbach	Fracture	72	85
Rothbach	Fracture	153	61
Rothbach	Fracture	84	82
Soultz les bains	Fracture	207	86
Soultz les bains	Fracture	259	75
Soultz les bains	Fracture	194	78
Soultz les bains	Fracture	253	74
Soultz les bains	Fracture	210	79
Soultz les bains	Fracture	85	89
Soultz les bains	Fracture	220	72
Soultz les bains	Fracture	256	77
Soultz les bains	Fracture	192	81
Soultz les bains	Fracture	262	82
Soultz les bains	Fracture	215	81
Soultz les bains	Fracture	290	75
Soultz les bains	Fracture	213	80
Soultz les bains	Fracture	297	75
Soultz les bains	Fracture	302	75
Soultz les bains	Fracture	241	70
Soultz les bains	Fracture	214	89
Soultz les bains	Fracture	217	89
Soultz les bains	Fracture	253	80
Soultz les bains	Fracture	212	80
Soultz les bains	Fracture	215	80
Soultz les bains	Fracture	305	79
Soultz les bains	Fracture	211	84
Soultz les bains	Fracture	296	78
Soultz les bains	Fracture	214	89
Soultz les bains	Fracture	289	88
Soultz les bains	Fracture	200	82
Soultz les bains	Fracture	284	82
Soultz les bains	Fracture	225	65
Soultz les bains	Fracture	192	83
Soultz les bains	Fracture	226	82
Soultz les bains	Fracture	210	78
Soultz les bains	Fracture	294	83
Soultz les bains	Fracture	183	89
Soultz les bains	Fracture	275	76
Soultz les bains	Fracture	282	80
Soultz les bains	Fracture	200	85
Soultz les bains	Fracture	178	76
Soultz les bains	Fracture	255	86
Soultz les bains	Fracture	208	87
Soultz les bains	Fracture	265	86
Soultz les bains	Fracture	257	86
Soultz les bains	Fracture	254	78
Soultz les bains	Fracture	244	59
Soultz les bains	Fracture	120	51
Soultz les bains	Fracture	254	76
Soultz les bains	Fracture	223	89
Soultz les bains	Fracture	287	78
Soultz les bains	Fracture	201	73
Soultz les bains	Fracture	205	86
Soultz les bains	Fracture	312	82
Soultz les bains	Fracture	194	73
Soultz les bains	Fracture	272	77
Soultz les bains	Fracture	165	89
Soultz les bains	Fracture	321	84
Soultz les bains	Fracture	123	89
Soultz les bains	Fracture	220	88
Soultz les bains	Fracture	203	80
Soultz les bains	Fracture	305	73
Champenay	Fracture	28	88
Champenay	Fracture	113	84
Champenay	Fracture	157	71
Champenay	Fracture	301	84
Champenay	Fracture	143	65
Champenay	Fracture	166	58
Champenay	Fracture	111	74
Champenay	Fracture	241	73
Champenay	Fracture	175	0
Champenay	Fracture	112	0
Champenay	Fracture	95	0
Saint Pierre Bois	Fracture	95	73
Saint Pierre Bois	Fracture	205	81
Saint Pierre Bois	Fracture	100	70
Saint Pierre Bois	Fracture	17	85
Saint Pierre Bois	Fracture	107	85
Saint Pierre Bois	Fracture	180	85
Saint Pierre Bois	Fracture	103	82
Saint Pierre Bois	Fracture	102	75
Saint Pierre Bois	Fracture	180	77
Bülh	Fracture zone	95	80
Bülh	Fracture zone	95	80
Bülh	Cataclased zone	72	63
Bülh	Fracture	215	85
Bülh	Fracture zone	305	80
Bülh	Fracture	300	85
Hochburg	Cataclased zone	75	75

## Sheet: Outcrops-Quarries_Basement
Site	Type	Direction	Dip
Waldhambach	Fracture	108	79
Waldhambach	Fracture	107	81
Waldhambach	Fracture	112	77
Waldhambach	Fracture	113	82
Waldhambach	Fracture	118	81
Waldhambach	Fracture	115	81
Waldhambach	Fracture	167	84
Waldhambach	Fracture	112	72
Waldhambach	Fracture	174	87
Waldhambach	Fracture	105	73
Waldhambach	Fracture	105	72
Waldhambach	Fracture	237	50
Waldhambach	Fracture	112	76
Waldhambach	Fracture	183	72
Waldhambach	Fracture	190	73
Waldhambach	Fracture	155	87
Waldhambach	Fracture	160	88
Waldhambach	Fracture	150	74
Waldhambach	Fracture	214	87
Waldhambach	Fracture	160	88
Waldhambach	Fracture	164	79
Waldhambach	Fracture	153	78
Waldhambach	Fracture	338	88
Waldhambach	Fracture	157	89
Waldhambach	Fracture	394	60
Waldhambach	Fracture	393	57
Waldhambach	Fracture	329	78
Waldhambach	Fracture	108	78
Waldhambach	Fracture	365	42
Waldhambach	Fracture	393	56
Waldhambach	Fracture	251	68
Waldhambach	Fracture	247	82
Waldhambach	Fracture	244	74
Waldhambach	Fracture	208	61
Waldhambach	Fracture	204	56
Waldhambach	Fracture	393	62
Waldhambach	Fracture	387	52
Waldhambach	Fracture	394	52
Waldhambach	Fracture	379	50
Waldhambach	Fracture	378	55
Waldhambach	Fracture	400	50
Waldhambach	Fracture	210	63
Waldhambach	Fracture	398	67
Waldhambach	Fracture	397	76
Waldhambach	Fracture	113	60
Waldhambach	Fracture	125	77
Waldhambach	Fracture	220	84
Waldhambach	Fracture	388	87
Waldhambach	Fracture	388	87
Waldhambach	Fracture	393	84
Waldhambach	Fracture	400	84
Waldhambach	Fracture	398	83
Waldhambach	Fracture	120	77
Waldhambach	Fracture	114	76
Waldhambach	Fracture	400	81
Waldhambach	Fracture	116	81
Waldhambach	Fracture	130	89
Waldhambach	Fracture	126	82
Waldhambach	Fracture	125	79
Waldhambach	Fracture	123	76
Waldhambach	Fracture	264	68
Waldhambach	Fracture	400	89
Waldhambach	Fracture	124	88
Waldhambach	Fracture	128	81
Waldhambach	Fracture	127	80
Waldhambach	Fracture	114	73
Waldhambach	Fracture	404	75
Waldhambach	Fracture	300	84
Waldhambach	Fracture	298	88
Waldhambach	Fracture	302	89
Waldhambach	Fracture	402	79
Waldhambach	Fracture	123	85
Waldhambach	Fracture	115	77
Waldhambach	Fracture	108	81
Waldhambach	Fracture	115	82
Waldhambach	Fracture	111	76
Waldhambach	Fracture	117	76
Waldhambach	Fracture	428	63
Waldhambach	Fracture	344	81
Waldhambach	Fracture	228	64
Waldhambach	Fracture	405	57
Waldhambach	Fracture	433	58
Waldhambach	Fracture	435	62
Waldhambach	Fracture	437	63
Waldhambach	Fracture	353	75
Waldhambach	Fracture	356	72
Waldhambach	Fracture	288	78
Waldhambach	Fracture	282	76
Waldhambach	Fracture	117	77
Waldhambach	Fracture	222	84
Waldhambach	Fracture	228	84
Waldhambach	Fracture	382	85
Waldhambach	Fracture	384	88
Waldhambach	Fracture	408	70
Weiler	Fracture	274	60
Weiler	Cataclased zone	347	88
Weiler	Fracture	155	80
Weiler	Fracture	245	84
Weiler	Fracture	333	87
Weiler	Fracture	330	65
Weiler	Fracture	64	80
Weiler	Fracture	330	88
Windstein	Fracture	55	90
Windstein	Fracture	283	51
Windstein	Fracture zone	50	84
Windstein	Fracture	235	87
Windstein	Vein	246	45
Windstein	Cataclased zone	238	84
Windstein	Fracture	100	62
Windstein	Fracture	33	72
Windstein	Cataclased zone	40	50
Windstein	Fracture	120	89
Windstein	Fracture	225	80
Windstein	Fracture	110	75
Windstein	Fracture	235	80
Windstein	Fracture	245	82
Windstein	Fracture	165	78
Windstein	Fracture	163	75
Windstein	Fracture	245	82
Windstein	Fracture	160	65
Windstein	Fracture	230	80
Windstein	Fracture	243	88
Windstein	Fracture	210	89
Windstein	Fracture	220	89
Windstein	Fracture	225	89
Andlau	Fracture	71	87
Andlau	Fracture	283	72
Andlau	Fracture	49	79
Andlau	Fracture	168	84
Andlau	Fracture	63	89
Andlau	Fracture	327	80
Andlau	Fracture	53	79
Andlau	Fracture	126	79
Andlau	Fracture	36	71
Andlau	Fracture	265	80
Andlau	Fracture	92	86
Andlau	Fracture	61	84
Andlau	Fracture	335	83
Andlau	Fracture	70	84
Andlau	Fracture	332	79
Andlau	Fracture	57	89
Andlau	Fracture	57	89
Andlau	Fracture	156	89
Andlau	Fracture	64	84
Andlau	Fracture	278	83
Andlau	Fracture	345	73
Andlau	Fracture	344	83
Andlau	Fracture	339	79
Andlau	Fracture	145	87
Andlau	Fracture zone	64	80
Andlau	Cataclased zone	307	64
Andlau	Cataclased zone	20	59
Andlau	Cataclased zone	293	90
Andlau	Cataclased zone	0	47
Andlau	Fracture	65	85
Andlau	Fracture	253	75
Andlau	Fracture	70	82
Andlau	Fracture	72	82
Andlau	Fracture	14	50
Andlau	Fracture	350	78
Andlau	Fracture	55	82
Andlau	Fracture	55	84
Andlau	Fracture	52	76
Andlau	Fracture	54	82
Andlau	Fracture	50	83
Andlau	Fracture	45	86
Andlau	Fracture	223	87
Andlau	Fracture	227	87
Andlau	Fracture	226	85
Andlau	Fracture	50	82
Andlau	Fracture	62	72
Andlau	Fracture	55	77
Andlau	Fracture	55	82
Andlau	Fracture	57	78
Saint Pierre Bois	Fracture	186	68
Saint Pierre Bois	Fracture	315	52
Saint Pierre Bois	Fracture	185	77
Saint Pierre Bois	Fracture	210	65
Saint Pierre Bois	Fracture	350	85
Saint Pierre Bois	Fracture	85	82
Saint Pierre Bois	Fracture	290	32
Saint Pierre Bois	Fracture	285	74
Saint Pierre Bois	Fracture	175	82
Saint Pierre Bois	Fracture	30	68
Saint Pierre Bois	Fracture	170	60
Saint Pierre Bois	Fracture	166	55
Saint Pierre Bois	Fracture	170	50
Saint Pierre Bois	Fracture	172	50
Saint Pierre Bois	Fracture	150	70
Saint Pierre Bois	Fracture	160	73
Saint Pierre Bois	Fracture	160	76
Saint Pierre Bois	Fracture	185	85
Saint Pierre Bois	Fracture	180	84
Saint Pierre Bois	Fracture	135	52
Saint Pierre Bois	Fracture	145	49
Saint Pierre Bois	Fracture	172	85
Saint Pierre Bois	Fracture	304	50
Saint Pierre Bois	Fracture	295	38
Saint Pierre Bois	Fracture	116	60
Saint Pierre Bois	Fracture	120	60
Saint Pierre Bois	Fracture	85	50
Saint Pierre Bois	Fracture	180	83
Saint Pierre Bois	Fracture	176	80
Saint Pierre Bois	Fracture	100	75
Saint Pierre Bois	Fracture	332	85
Saint Pierre Bois	Fracture	190	85
Saint Pierre Bois	Fracture	183	80
Saint Pierre Bois	Fracture	182	87
Saint Pierre Bois	Fracture	165	84
Saint Pierre Bois	Fracture	184	90
Saint Pierre Bois	Fracture	117	60
Saint Pierre Bois	Fracture	180	80
Saint Pierre Bois	Fracture	117	40
Saint Pierre Bois	Fracture	112	67
Saint Pierre Bois	Fracture	194	83
Saint Pierre Bois	Fracture	115	90
Saint Pierre Bois	Fracture	130	62
Saint Pierre Bois	Fracture	160	48
Saint Pierre Bois	Fracture	110	0
Saint Pierre Bois	Fracture	53	66
Saint Pierre Bois	Fracture	183	75
Saint Pierre Bois	Fracture	183	75
Saint Pierre Bois	Fracture	173	80
Saint Pierre Bois	Fracture	82	83
Saint Pierre Bois	Fracture	174	70
Saint Pierre Bois	Fracture	40	56
Saint Pierre Bois	Fracture	195	79
Saint Pierre Bois	Fracture	182	80
Saint Pierre Bois	Fracture	60	88
Saint Pierre Bois	Fracture	83	46
Saint Pierre Bois	Fracture	65	74
Saint Pierre Bois	Fracture	120	60
Saint Pierre Bois	Fracture	185	84
Saint Pierre Bois	Fracture	190	76
Saint Pierre Bois	Fracture	180	78
Saint Pierre Bois	Fracture	182	80
Saint Pierre Bois	Fracture	300	40
Saint Pierre Bois	Fracture	60	70
Saint Pierre Bois	Fracture	176	80
Saint Pierre Bois	Fracture	72	50
Saint Pierre Bois	Fracture	175	70
Saint Pierre Bois	Fracture	73	62
Saint Pierre Bois	Fracture	75	52
Saint Pierre Bois	Fracture	108	52
Saint Pierre Bois	Fracture	157	68
Saint Pierre Bois	Fracture	105	58
Saint Pierre Bois	Fracture	316	56
Saint Pierre Bois	Fracture	105	58
Saint Pierre Bois	Fracture	105	58
Saint Pierre Bois	Fracture	90	60
Saint Pierre Bois	Fracture	105	58
Saint Pierre Bois	Fracture	105	58
Saint Pierre Bois	Fracture	70	70
Saint Pierre Bois	Fracture	85	63
Saint Pierre Bois	Fracture	265	60
Saint Pierre Bois	Fracture	50	75
Saint Pierre Bois	Fracture	153	85
Saint Pierre Bois	Fracture	130	86
Saint Pierre Bois	Fracture	215	78
Saint Pierre Bois	Fracture	200	70
Saint Pierre Bois	Fracture	180	76
Saint Pierre Bois	Fracture	70	76
Saint Pierre Bois	Fracture	50	35
Saint Pierre Bois	Fracture	60	73
Saint Pierre Bois	Fracture	45	62
Saint Pierre Bois	Fracture	56	65
Saint Pierre Bois	Fracture	335	50
Saint Pierre Bois	Fracture	148	70
Saint Pierre Bois	Fracture	110	45
Saint Pierre Bois	Fracture	110	55
Saint Pierre Bois	Fracture	178	72
Saint Pierre Bois	Fracture	185	82
Saint Pierre Bois	Fracture	24	86
Saint Pierre Bois	Fracture	175	80
Saint Pierre Bois	Fracture	180	77
Saint Pierre Bois	Fracture	13	85
Saint Pierre Bois	Fracture	96	55
Saint Pierre Bois	Fracture	10	88
Saint Pierre Bois	Fracture	66	68
Saint Pierre Bois	Fracture	20	50
Saint Pierre Bois	Fracture	130	42
Saint Pierre Bois	Fracture	180	82
Saint Pierre Bois	Fracture	100	46
Saint Pierre Bois	Fracture	270	45
Saint Pierre Bois	Fracture	190	87
Saint Pierre Bois	Fracture	5	80
Saint Pierre Bois	Fracture	100	74
Saint Pierre Bois	Fracture	65	83
Saint Pierre Bois	Fracture	195	80
Saint Pierre Bois	Fracture	30	83
Saint Pierre Bois	Fracture	124	55
Saint Pierre Bois	Fracture	118	58
Saint Pierre Bois	Fracture	120	55
Saint Pierre Bois	Fracture	20	87
Saint Pierre Bois	Fracture	15	85
Saint Pierre Bois	Fracture	114	50
Saint Pierre Bois	Fracture	13	84
Saint Pierre Bois	Fracture	5	87
Saint Pierre Bois	Fracture	24	86
Saint Pierre Bois	Fracture	90	35
Saint Pierre Bois	Fracture	178	84
Saint Pierre Bois	Fracture	205	92
Saint Pierre Bois	Fracture	98	72
Saint Pierre Bois	Fracture	183	85
Saint Pierre Bois	Fracture	320	83
Saint Pierre Bois	Fracture	124	55
Saint Pierre Bois	Fracture	195	85
Saint Pierre Bois	Fracture	165	66
Saint Pierre Bois	Fracture	187	79
Saint Pierre Bois	Fracture	70	66
Saint Pierre Bois	Fracture	193	87
Saint Pierre Bois	Fracture	8	88
Saint Pierre Bois	Fracture	8	86
Saint Pierre Bois	Fracture	135	50
Saint Pierre Bois	Fracture	74	65
Saint Pierre Bois	Fracture	186	83
Saint Pierre Bois	Fracture	280	84
Saint Pierre Bois	Fracture	195	65
Saint Pierre Bois	Fracture	120	76
Saint Pierre Bois	Fracture	197	78
Saint Pierre Bois	Fracture	120	45
Saint Pierre Bois	Fracture	46	72
Saint Pierre Bois	Fracture	57	65
Saint Pierre Bois	Fracture	182	78
Saint Pierre Bois	Fracture	185	83
Saint Pierre Bois	Fracture	180	89
Saint Pierre Bois	Fracture	185	83
Saint Pierre Bois	Fracture	5	83
Saint Pierre Bois	Fracture	190	86
Saint Pierre Bois	Fracture	13	87
Saint Pierre Bois	Fracture	10	86
Saint Pierre Bois	Fracture	190	89
Saint Pierre Bois	Fracture	187	85
Saint Pierre Bois	Fracture	132	55
Saint Pierre Bois	Fracture	12	89
Saint Pierre Bois	Fracture	98	36
Saint Pierre Bois	Fracture	186	87
Saint Pierre Bois	Fracture	163	76
Saint Pierre Bois	Fracture	188	86
Saint Pierre Bois	Fracture	168	55
Saint Pierre Bois	Fracture	220	88
Saint Pierre Bois	Fracture	315	50
Saint Pierre Bois	Fracture	6	85
Saint Pierre Bois	Fracture	173	89
Saint Pierre Bois	Fracture	63	72
Saint Pierre Bois	Fracture	135	50
Saint Pierre Bois	Fracture	10	75
Saint Pierre Bois	Fracture	195	80
Saint Pierre Bois	Fracture	224	89
Saint Pierre Bois	Fracture	13	84
Saint Pierre Bois	Fracture	110	50
Saint Pierre Bois	Fracture	190	88
Saint Pierre Bois	Fracture	115	50
Saint Pierre Bois	Fracture	180	85
Saint Pierre Bois	Fracture	0	80
Saint Pierre Bois	Fracture	190	75
Saint Pierre Bois	Fracture	110	43
Saint Pierre Bois	Fracture	45	60
Saint Pierre Bois	Fracture	120	70
Saint Pierre Bois	Fracture	10	110
Saint Pierre Bois	Fracture	0	70
Saint Pierre Bois	Fracture	170	83
Saint Pierre Bois	Fracture	190	80
Saint Pierre Bois	Fracture	180	82
Saint Pierre Bois	Fracture	75	74
Saint Pierre Bois	Fracture	355	85
Saint Pierre Bois	Fracture	30	83
Saint Pierre Bois	Fracture	100	26
Saint Pierre Bois	Fracture	180	85
Saint Pierre Bois	Fracture	186	83
Saint Pierre Bois	Fracture	75	25
Saint Pierre Bois	Fracture	175	80
Saint Pierre Bois	Fracture	203	80
Saint Pierre Bois	Fracture	135	75
Saint Pierre Bois	Fracture	170	85
Saint Pierre Bois	Fracture	165	80
Saint Pierre Bois	Fracture	0	79
Saint Pierre Bois	Fracture	135	72
Saint Pierre Bois	Fracture	125	57
Saint Pierre Bois	Fracture	125	50
Saint Pierre Bois	Fracture	120	48
Saint Pierre Bois	Fracture	128	53
Saint Pierre Bois	Fracture	120	46
Saint Pierre Bois	Fracture	98	46
Saint Pierre Bois	Fracture	0	87
Saint Pierre Bois	Fracture	4	89
Saint Pierre Bois	Fracture	355	89
Saint Pierre Bois	Fracture	188	82
Saint Pierre Bois	Fracture	190	35
Saint Pierre Bois	Fracture	200	90
Saint Pierre Bois	Fracture	142	55
Saint Pierre Bois	Fracture	214	75
Saint Pierre Bois	Fracture	155	66
Saint Pierre Bois	Fracture	222	87
Saint Pierre Bois	Fracture	120	60
Saint Pierre Bois	Fracture	185	80
Saint Pierre Bois	Fracture	172	70
Saint Pierre Bois	Fracture	105	56
Saint Pierre Bois	Fracture	160	36
Saint Pierre Bois	Fracture	115	68
Saint Pierre Bois	Fracture	10	72
Saint Pierre Bois	Fracture	200	75
Saint Pierre Bois	Fracture	198	72
Wintzenheim	Fracture	51	83
Wintzenheim	Fracture	33	87
Wintzenheim	Fracture	48	82
Wintzenheim	Fracture	44	80
Wintzenheim	Fracture	42	82
Wintzenheim	Fracture	223	86
Wintzenheim	Fracture	18	87
Wintzenheim	Fracture	215	79
Wintzenheim	Fracture	13	81
Wintzenheim	Fracture	36	80
Wintzenheim	Fracture	102	69
Wintzenheim	Fracture	17	82
Wintzenheim	Fracture	140	74
Wintzenheim	Fracture	28	81
Wintzenheim	Fracture	151	82
Wintzenheim	Fracture	319	77
Wintzenheim	Fracture	166	79
Wintzenheim	Fracture	97	76
Wintzenheim	Fracture	235	85
Wintzenheim	Fracture	345	74
Wintzenheim	Fracture	100	55
Metzeral	Fracture	13	50
Metzeral	Fracture	66	81
Metzeral	Fracture	90	85
Metzeral	Fracture	170	79
Metzeral	Fracture zone	245	83
Wald Michelbach	Fracture	265	75
Wald Michelbach	Fracture	160	78
Wald Michelbach	Fracture zone	175	37
Wald Michelbach	Fracture	275	80
Wald Michelbach	Fracture zone	190	60
Weinheim	Fracture	195	78
Weinheim	Fracture	355	83
Weinheim	Fracture	300	68
Weinheim	Fracture	213	78
Weinheim	Fracture	275	55
Weinheim	Fracture	295	60
Weinheim	Fracture	260	80
Weinheim	Large fracture	225	74
Weinheim	Fault	293	80
Weinheim	Fracture	90	80
Weinheim	Cataclased zone	75	55
Weinheim	Fracture	325	85
Wolfbrunnen	Fracture	186	60
Wolfbrunnen	Fracture	185	60
Wolfbrunnen	Fracture	185	50
Wolfbrunnen	Fracture	200	70
Wolfbrunnen	Cataclased zone	102	60
Wolfbrunnen	Fracture	90	70
Wolfbrunnen	Fracture	13	75
Wolfbrunnen	Fracture	15	73
Wolfbrunnen	Fracture zone	200	80
Wolfbrunnen	Fracture	90	72
Wolfbrunnen	Cataclased zone	87	67
Ottenhöffen	Fracture	305	30
Ottenhöffen	Fracture	250	70
Ottenhöffen	Fracture	25	85
Ottenhöffen	Fracture	248	50
Ottenhöffen	Fracture	60	82
Ottenhöffen	Fracture	245	74
Ottenhöffen	Fracture	100	70
Ottenhöffen	Fracture	125	60
Ottenhöffen	Fracture	100	54
Ottenhöffen	Fracture	45	10
Ottenhöffen	Fracture	95	55
Ottenhöffen	Fracture	0	80
Ottenhöffen	Fracture	194	80
Ottenhöffen	Faille	70	35
Ottenhöffen	Cataclased zone	45	70
Ottenhöffen	Fracture	205	87
Ottenhöffen	Fracture	65	40
Steinach	Fracture	295	20
Steinach	Fracture	96	69
Steinach	Fracture	40	85
Steinach	Cataclased zone	20	80
Steinach	Fracture	100	80
Steinach	Fault	250	80
Steinach	Fracture	107	80
Steinach	Fracture zone	45	90

## Sheet: Infrared data
Référence échantillon	nature de la roche	major clay	traces
Ottenhoffen
01-K	granite	Illite Muscovite	Montmorillonite
01-L	granite	Illite Muscovite	Montmorillonite
01-M	cohesive cataclasite	Illite Muscovite	Montmorillonite
01-N	granite	Kaolinite	Montmorillonite
01-O	granite	Kaolinite	Muscovite
Wolfbrunnen
03-A	granite	Muscovite
03-C	granite	Illite Muscovite	Montmorillonite
03-F	granite	Illite Muscovite	Montmorillonite
03-I	granite	Illite Muscovite	Kaolinite
03-J	granite	Kaolinite	Muscovite
03-K	granite	Muscovite	Kaolinite
Wald Michelbach
11-A	granite	Illite Muscovite	Ankerite
11-B	granite	Illite Muscovite
11-D	granite	Illite Muscovite
Hochburg
4	sandstone	Illite Muscovite	Kaolinite

## Sheet: EPMA on feldspar
EPS1 sandstones	feldspar type	oxide contents in weight %							structural formulae calculated on the basis of 8 oxygen atoms
		Al2O3	CaO	K2O	Na2O	SiO2	Total		Ca	K	Na		Al	Si		Ba
EPS1-1169.87 m	authigenic Kfs	17.97	0	17	0.013	64.399	99.382		0	1.01204	0.00117619	1.01322	0.988368	3.00502		<dl
EPS1-1169.87 m	authigenic Kfs	17.812	0	17.018	0.055	64.361	99.246		0	1.01458	0.00498338	1.01956	0.981093	3.00758		<dl
EPS1-1169.87 m	authigenic Kfs	18.122	0	16.352	0.387	64.149	99.01		0	0.973916	0.0350306	1.00895	0.99719	2.99474		<dl
EPS1-1170.13 m	authigenic Kfs	17.963	0	16.102	0.078	62.897	97.04		0	0.97656	0.0071895	0.983749	1.00651	2.98998		<dl
EPS1-1170.13 m	authigenic Kfs	17.485	0	16.635	0.066	63.839	98.025		0	1.00175	0.00604038	1.00779	0.972797	3.01328		<dl
EPS1-1169.87 m	detrital Kfs	18.18	0	15.486	0.962	64.247	99.294		0	0.920803	0.0869336	1.00774	0.998717	2.99433		3752.53
EPS1-1169.87 m	detrital Kfs	18.403	0	15.97	0.669	64.705	100.565		0	0.940913	0.059904	1.00082	1.00174	2.98814		7325.94
EPS1-1169.87 m	detrital Kfs	18.388	0	16.549	0.348	64.891	101.117		0	0.972594	0.0310831	1.00368	0.998425	2.98926		8427.52
EPS1-1169.87 m	detrital Kfs	18.428	0	16.063	0.847	65.099	100.589		0	0.941942	0.075486	1.01743	0.998383	2.9922		1361.3
EPS1-1169.87 m	detrital Kfs	17.693	0	16.682	0.507	63.492	98.605		0	1.00421	0.0463839	1.05059	0.984004	2.99579		2068.82
EPS1-1169.87 m	detrital Kfs	18.15	0	15.435	0.842	63.672	98.393		0	0.924668	0.0766614	1.00133	1.00456	2.98983		2633.04
EPS1-1169.87 m	detrital Kfs	18.326	0	16.19	0.572	64.972	101.125		0	0.951242	0.051077	1.00232	0.994794	2.99219		9538.05
EPS1-1169.87 m	detrital Kfs	18.452	0	16.287	0.406	65.099	101.142		0	0.954917	0.0361773	0.991094	0.999514	2.9917		8042.41
EPS1-1169.87 m	detrital Kfs	18.046	0	15.514	0.941	64.382	99.417		0	0.922119	0.0850038	1.00712	0.990981	2.99948		4782.46
EPS1-1169.87 m	detrital Kfs	18.018	0	16.338	0.284	64.953	100.145		0	0.965185	0.0254985	0.990684	0.983421	3.00767		4943.67
EPS1-1169.87 m	detrital Kfs	17.747	0.073	15.181	1.15	64.157	98.682		0.00366033	0.906326	0.104344	1.01433	0.978881	3.00225		3349.51
EPS1-1170.13 m	detrital Kfs	17.976	0	15.258	1.084	64.645	99.461		0	0.90473	0.0976868	1.00242	0.984771	3.00452		4460.05				̶
EPS1-1170.13 m	detrital Kfs	17.738	0	15.578	0.818	64.029	99.016		0	0.931833	0.0743644	1.0062	0.980285	3.00208		7639.4
EPS1-1170.13 m	detrital Kfs	18.159	0	15.913	0.561	64.776	100.005		0	0.940234	0.050377	0.990611	0.991281	2.99997		5337.73
EPS1-1170.13 m	detrital Kfs	18.193	0	15.439	0.93	64.585	99.946		0	0.913596	0.083638	0.997234	0.994628	2.99561		7155.78
EPS1-1170.75 m	detrital Kfs	17.921	0.043	14.699	1.277	64.179	98.936		0.0021523	0.876012	0.115664	0.993828	0.986747	2.99802		7316.98
EPS1-1170.75 m	detrital Kfs	18.275	0	15.108	1.113	64.217	99.708		0	0.896746	0.100402	0.997148	1.00217	2.98766		8911.14
EPS1-1170.75 m	detrital Kfs	18.669	0	15.941	0.349	64.889	100.577		0	0.935988	0.0311434	0.967132	1.01274	2.98638		6528.86	1361.3	9538.05
Waldhambach granite	alb	21.337	0.894	1.327	9.94	63.806	97.595		0.0432795	0.87077	0.0764896	0.990539	1.13628	2.88278		<dl
Waldhambach granite	alb	20.925	0.197	1.411	9.178	64.589	96.966		0.00954715	0.804874	0.0814182	0.895839	1.11553	2.92127		<dl
Waldhambach granite	alb	19.928	0.136	0.124	11.634	68.365	100.217		0.0063527	0.983379	0.00689649	0.996628	1.02398	2.98029		<dl
Waldhambach granite	alb	19.44	0.199	0.028	11.396	67.208	98.42		0.00946578	0.980908	0.0015858	0.991959	1.0172	2.98353		<dl
Waldhambach granite	alb	19.263	0.285	0.053	11.412	66.727	97.807		0.0136507	0.989109	0.00302255	1.00578	1.01494	2.98275		<dl
Waldhambach granite	alb	19.253	0.269	0.066	11.162	66.547	97.381		0.0129286	0.970761	0.00377684	0.987467	1.0179	2.98492		<dl
Waldhambach granite	alb	19.25	0.266	0.12	11.978	66.538	98.324		0.0127196	1.03645	0.00683219	1.056	1.01258	2.96939		<dl
Waldhambach granite	plg	18.284	5.988	0.426	10.488	61.085	96.379		0.299355	0.948791	0.0253572	1.2735	1.00551	2.85001		<dl

## Sheet: EPMA on carbonates
Sample	Mineral	Comments	Oxide contents (in weight %)						Structural formulae calculated on the basis of 3 atoms of oxygen
			FeO	CaO	MgO	MnO	CO2		Fe	Ca	Mg	Mn				Fe	Ca	Mg
sandstones EPS1-1384 m	Dol	main cement, later than authigenic quartz	0.055742	27.7541	19.8397	0.570906	51.7796		0.000775811	0.494902	0.492299	0.00804773				0.000775811	0.494902	0.492299
sandstones EPS1-1384 m	Dol	main cement, later than authigenic quartz	0.0919546	27.7904	19.8166	0.541218	51.7598		0.00127981	0.49555	0.491728	0.00762924				0.00127981	0.49555	0.491728
sandstones EPS1-1384 m	Dol	main cement, later than authigenic quartz	0.193644	27.2609	20.0373	0.834159	51.674		0.00269511	0.486107	0.497204	0.0117587				0.00269511	0.486107	0.497204
sandstones EPS1-1384 m	Dol	main cement, later than authigenic quartz	0.216822	27.407	19.953	0.693294	51.7299		0.0030177	0.488712	0.495111	0.00977297				0.0030177	0.488712	0.495111
sandstones EPS1-1384 m	Ank	rims of dolomite	10.3268	29.5503	8.53276	8.27115	43.319		0.143727	0.526931	0.211731	0.116594				0.143727	0.526931	0.211731
sandstones EPS1-1384 m	Ank	rims of dolomite	11.5683	19.8316	4.76947	4.24687	59.5838		0.161006	0.353631	0.118349	0.0598656				0.161006	0.353631	0.118349
sandstones EPS1-1384 m	Ank	rims of dolomite	12.7733	28.8101	9.31841	4.92309	44.1751		0.177778	0.513731	0.231226	0.0693979				0.177778	0.513731	0.231226
sandstones EPS1-1384 m	Ank	rims of dolomite	12.8857	28.5932	7.9057	6.92944	43.6859		0.179342	0.509865	0.196171	0.0976804				0.179342	0.509865	0.196171
granite EPS1-1418m	Dol	horizontal fracture	0	28.0336	19.9364	0.381391	51.6486		0	0.499885	0.4947	0.00537625				0	0.499885	0.4947
granite EPS1-1418m	Dol	horizontal fracture	0	28.5321	19.2432	0.518576	51.7061		0	0.508776	0.477498	0.00731006				0	0.508776	0.477498
granite EPS1-1418m	Dol	horizontal fracture	0.0294732	28.1648	19.5104	0.550167	51.7452		0.000410205	0.502225	0.484129	0.00775539				0.000410205	0.502225	0.484129
granite EPS1-1418m	Dol	horizontal fracture	0.0757478	28.6629	19.3522	0.44201	51.4671		0.00105425	0.511108	0.480204	0.00623076				0.00105425	0.511108	0.480204
granite EPS1-1418m	Dol	horizontal fracture	0.0916624	28.2765	19.606	0.413816	51.612		0.00127575	0.504218	0.486501	0.00583332				0.00127575	0.504218	0.486501
granite EPS1-1418m	Sid	fibrous siderite between sheets of altered biotite	55.3786	1.16652	3.42979	6.53935	33.4857		0.770754	0.0208009	0.0851064	0.0921815				0.770754	0.0208009	0.0851064
granite EPS1-1418m	Sid	fibrous siderite between sheets of altered biotite	56.5444	0.893852	7.03497	1.09792	34.4289		0.786979	0.0159389	0.174565	0.0154767				0.786979	0.0159389	0.174565
granite EPS1-1418m	Sid	fibrous siderite between sheets of altered biotite	59.257	0.888025	2.79611	5.96145	31.0974		0.824732	0.015835	0.0693824	0.0840352				0.824732	0.015835	0.0693824
granite EPS1-1418m	Sid	fibrous siderite between sheets of altered biotite	59.8557	0.971888	5.27886	0.940319	32.9532		0.833064	0.0173304	0.130989	0.0132551				0.833064	0.0173304	0.130989
granite EPS1-1418m	Sid	fibrous siderite between sheets of altered biotite	62.0647	0.921775	4.06872	0.854963	32.0899		0.863809	0.0164368	0.100961	0.0120519				0.863809	0.0164368	0.100961
granite EPS1-1427m	Dol	polyphased filling in mm-thick fracture	0.00736943	28.3005	19.2324	1.18187	51.2779		0.000102567	0.504644	0.47723	0.0166602				0.000102567	0.504644	0.47723
granite EPS1-1427m	Dol	polyphased filling in mm-thick fracture	0.565691	27.2371	19.7787	0.873233	51.5453		0.00787323	0.485682	0.490786	0.0123095				0.00787323	0.485682	0.490786
granite EPS1-1427m	Dol	polyphased filling in mm-thick fracture	2.82846	26.3679	19.2266	0.340108	51.2369		0.0393661	0.470184	0.477086	0.0047943				0.0393661	0.470184	0.477086
granite EPS1-1427m	Ank	polyphased filling in mm-thick fracture	8.56794	29.554	13.1185	1.95477	46.8048		0.119248	0.526997	0.325522	0.0275552				0.119248	0.526997	0.325522
granite EPS1-1427m	Ank	polyphased filling in mm-thick fracture	10.7072	28.3401	9.81713	6.95564	44.18		0.149021	0.505352	0.243601	0.0980496				0.149021	0.505352	0.243601
granite EPS1-1427m	Ank	polyphased filling in mm-thick fracture	10.892	30.9819	10.572	2.11123	45.4429		0.151594	0.552459	0.262333	0.0297608				0.151594	0.552459	0.262333
granite EPS1-1427m	Ank	polyphased filling in mm-thick fracture	15.2496	30.6665	8.92986	1.21372	43.9403		0.212242	0.546836	0.221585	0.0171091				0.212242	0.546836	0.221585
granite EPS1-1427m	Ank	polyphased filling in mm-thick fracture	17.5989	29.1594	8.35705	1.74815	43.1365		0.244939	0.51996	0.207371	0.0246427				0.244939	0.51996	0.207371
granite EPS1-1427m	Ank	polyphased filling in mm-thick fracture	17.753	29.7994	5.36697	6.1717	40.909		0.247084	0.531373	0.133176	0.0869989				0.247084	0.531373	0.133176
granite EPS1-1427m	Ank	polyphased filling in mm-thick fracture	18.2719	29.4749	5.31168	6.05565	40.8859		0.254306	0.525587	0.131803	0.085363				0.254306	0.525587	0.131803
granite EPS1-1427m	Ank	polyphased filling in mm-thick fracture	18.3286	33.1818	5.04826	1.72184	41.7195		0.255095	0.591687	0.125267	0.0242717				0.255095	0.591687	0.125267
granite EPS1-1427m	Ank	polyphased filling in mm-thick fracture	18.5422	30.1285	7.42149	0.995794	42.912		0.258069	0.537242	0.184156	0.0140371				0.258069	0.537242	0.184156
granite EPS1-1427m	Ank	polyphased filling in mm-thick fracture	19.6353	31.5062	5.21093	2.33909	41.3085		0.273282	0.561809	0.129304	0.0329728				0.273282	0.561809	0.129304
granite EPS1-1427m	Ank	polyphased filling in mm-thick fracture	19.775	30.9097	5.28195	2.59217	41.4412		0.275226	0.551172	0.131066	0.0365403				0.275226	0.551172	0.131066
granite EPS1-1427m	Ank	polyphased filling in mm-thick fracture	20.0053	30.2187	6.34481	1.63004	41.8012		0.278431	0.538849	0.157439	0.0229778				0.278431	0.538849	0.157439
granite EPS1-1427m	Ank	polyphased filling in mm-thick fracture	20.5836	29.8702	2.74592	7.94177	38.8585		0.28648	0.532636	0.0681369	0.111951				0.28648	0.532636	0.0681369
granite EPS1-1427m	Ank	polyphased filling in mm-thick fracture	20.6899	29.6359	2.72609	8.01797	38.9301		0.28796	0.528457	0.0676449	0.113025				0.28796	0.528457	0.0676449
granite EPS1-1427m	Ank	polyphased filling in mm-thick fracture	24.6962	23.9876	7.34049	2.05893	41.9168		0.343719	0.427739	0.182146	0.0290236				0.343719	0.427739	0.182146
granite EPS1-1434m	Dol	filling of fracture	0.199812	28.171	19.0526	1.31268	51.264		0.00278097	0.502335	0.472768	0.0185041				0.00278097	0.502335	0.472768
granite EPS1-1434m	Dol	filling of fracture	0.380419	28.6854	18.6262	1.26926	51.0388		0.00529462	0.511508	0.462188	0.017892				0.00529462	0.511508	0.462188
granite EPS1-1434m	Ank	filling of fracture	10.6859	25.1501	10.4004	1.26244	52.5011		0.148725	0.448468	0.258075	0.0177959				0.148725	0.448468	0.258075
granite EPS1-1434m	Ank	rim of dolomite fracture, contact with wall-rock	13.1912	29.4133	10.8315	1.17284	45.3913		0.183593	0.524488	0.26877	0.0165328				0.183593	0.524488	0.26877
granite EPS1-1434m	Ank	rim of dolomite fracture, contact with wall-rock	14.1914	26.8519	10.0913	2.22609	46.6394		0.197515	0.478813	0.250404	0.0313799				0.197515	0.478813	0.250404
granite EPS1-1434m	Ank	rim of dolomite fracture, contact with wall-rock	14.4635	28.696	9.39871	1.10339	46.3383		0.201302	0.511698	0.233219	0.0155538				0.201302	0.511698	0.233219
granite EPS1-1434m	Ank	euhedral grain growing on euhedral quartz	16.1711	28.3021	9.44405	1.16693	44.9158		0.225068	0.504674	0.234344	0.0164495				0.225068	0.504674	0.234344
granite EPS1-1434m	Ank	zoning in dolomite	18.7321	27.2404	8.73667	1.73522	43.5556		0.260711	0.485742	0.216791	0.0244604				0.260711	0.485742	0.216791
granite EPS1-1434m	Ank	zoning in dolomite	20.1801	24.3922	9.85872	1.84165	43.7273		0.280864	0.434954	0.244633	0.0259607				0.280864	0.434954	0.244633
granite EPS1-1648m	Cc	alteration of plagioclase	0.950707	53.8821	0.254688	0.569646	44.3428		0.0132318	0.960808	0.00631981	0.00802997				0.0132318	0.960808	0.00631981
granite EPS1-1648m	Dol	vein	2.90379	27.4285	18.003	1.56142	50.1033		0.0404146	0.489096	0.446724	0.0220105				0.0404146	0.489096	0.446724
granite EPS1-1648m	Dol	vein	2.46818	27.7163	17.7599	2.11143	49.9441		0.0343518	0.494228	0.440693	0.0297636				0.0343518	0.494228	0.440693
granite EPS1-1648m	Dol	vein	2.30476	26.0767	16.8062	1.90769	52.9047		0.0320774	0.464991	0.417027	0.0268916				0.0320774	0.464991	0.417027
granite EPS1-1648m	Dol	vein	1.59795	27.658	18.7822	1.29093	50.6708		0.0222401	0.493189	0.46606	0.0181975				0.0222401	0.493189	0.46606
granite EPS1-1648m	Dol	vein	3.17247	31.0642	15.3032	1.38947	49.0707		0.044154	0.553927	0.379731	0.0195866				0.044154	0.553927	0.379731
granite EPS1-1648m	Dol	vein	2.23413	27.1296	18.365	1.87705	50.3943		0.0310943	0.483765	0.455707	0.0264597				0.0310943	0.483765	0.455707
granite EPS1-2158 m	Cc	vein	0.00904962	55.3103	0	0.0180992	44.6626		0.000125952	0.986275	0	0.000255135				0.000125952	0.986275	0
granite EPS1-2158 m	Cc	vein	0.779949	53.9484	0.253292	1.18522	43.8331		0.0108552	0.96199	0.00628517	0.0167073				0.0108552	0.96199	0.00628517
granite EPS1-2158 m	Cc	vein	0.880614	53.7722	0.334709	1.43689	43.5756		0.0122563	0.958848	0.00830543	0.020255				0.0122563	0.958848	0.00830543
granite EPS1-2158 m	Sid	fibrous siderite between sheets of altered biotite	52.1329	0.38166	7.65913	0.501966	39.3243		0.72558	0.00680564	0.190053	0.00707593				0.72558	0.00680564	0.190053
granite EPS1-2158 m	Sid	fibrous siderite between sheets of altered biotite	53.116	0.11748	5.59548	0.435485	40.7356		0.739262	0.00209486	0.138846	0.00613878				0.739262	0.00209486	0.138846
granite EPS1-2158 m	Sid	fibrous siderite between sheets of altered biotite	57.5755	3.46945	4.49309	1.61573	32.8462		0.801329	0.061866	0.111491	0.0227761				0.801329	0.061866	0.111491
granite EPS1-2158 m	Sid	fibrous siderite between sheets of altered biotite	58.6886	0.444208	4.35388	1.15303	35.3603		0.816821	0.00792097	0.108037	0.0162536				0.816821	0.00792097	0.108037
granite EPS1-2158 m	Sid	fibrous siderite between sheets of altered biotite	59.118	0.546525	5.66879	0.454313	34.2123		0.822798	0.00974545	0.140665	0.00640419				0.822798	0.00974545	0.140665
granite EPS1-2161 m	Cc	veinlet crosscutting quartz and plagioclase	0.132517	55.5192	0	0.384517	43.9638		0.00184436	0.99	0.00041328	0.00542032				0.00184436	0.99	0.00041328
granite EPS1-2161 m	Cc	alteration of plagioclase	0.195911	54.0948	0.10819	0.794365	44.8067		0.00272667	0.964601	0.00268461	0.0111977				0.00272667	0.964601	0.00268461
granite EPS1-2161 m	Cc	veinlets crosscutting biotite	1.04428	53.2953	0.205076	1.24747	44.2079		0.0145342	0.950344	0.00508874	0.0175848				0.0145342	0.950344	0.00508874
granite EPS1-2161 m	Cc	veinlets crosscutting biotite	1.1252	53.3698	0.147222	1.34507	44.0127		0.0156603	0.951673	0.00365315	0.0189607				0.0156603	0.951673	0.00365315
granite EPS1-2161 m	Cc	alteration of plagioclase	1.90041	52.0151	0.714578	1.69364	43.6762		0.0264497	0.927516	0.0177315	0.0238742				0.0264497	0.927516	0.0177315
granite EPS1-2161 m	Ank	veinlets crosscutting biotite	9.27609	24.0208	9.02576	2.29515	55.3822		0.129104	0.428331	0.223964	0.0323534				0.129104	0.428331	0.223964
granite EPS1-2161 m	Ank	veinlets crosscutting biotite	10.4509	26.758	11.3711	2.72751	48.6925		0.145454	0.477139	0.282162	0.0384482				0.145454	0.477139	0.282162
granite EPS1-2161 m	Ank	vein	13.9362	27.644	11.4669	0.467813	46.485		0.193963	0.492939	0.284539	0.00659449				0.193963	0.492939	0.284539
granite EPS1-2161 m	Ank	veinlets crosscutting biotite	14.0491	27.8881	11.8606	0.808722	45.3935		0.195533	0.497291	0.294307	0.0114001				0.195533	0.497291	0.294307
granite EPS1-2161 m	Ank	vein	14.12	28.0213	11.5822	0.639011	45.6375		0.196521	0.499666	0.287399	0.00900776				0.196521	0.499666	0.287399
granite EPS1-2161 m	Ank	veinlets crosscutting biotite	14.3102	28.9398	10.9227	0.827959	44.9994		0.199167	0.516044	0.271035	0.0116713				0.199167	0.516044	0.271035
granite EPS1-2161 m	Sid	rim of calcite in contact with biotite	52.9546	2.1692	5.67546	0.52479	38.6759		0.737016	0.0386805	0.14083	0.00739765				0.737016	0.0386805	0.14083
granite EPS1-2161 m	Sid	rim of calcite in contact with biotite	55.4317	1.93287	5.12275	0.52675	36.9859		0.771492	0.0344663	0.127115	0.00742529				0.771492	0.0344663	0.127115
granite Waldhambach	Dol	main filling of polyphased vein	0.00464973	27.3971	19.8292	1.19591	51.5731		6.47144e-05	0.488537	0.49204	0.0168581				6.47144e-05	0.488537	0.49204
granite Waldhambach	Dol	main filling of polyphased vein	0.0250106	28.0758	19.2313	1.26813	51.3997		0.000348095	0.500639	0.477204	0.0178761				0.000348095	0.500639	0.477204
granite Waldhambach	Dol	main filling of polyphased vein	0.0458419	27.2741	20.0631	0.727969	51.889		0.000638022	0.486342	0.497845	0.0102618				0.000638022	0.486342	0.497845
granite Waldhambach	Dol	main filling of polyphased vein	0.0507273	27.73	19.6408	1.14418	51.4343		0.000706016	0.494471	0.487366	0.0161289				0.000706016	0.494471	0.487366
granite Waldhambach	Dol	main filling of polyphased vein	0.0511256	28.4229	18.7872	1.39775	51.341		0.00071156	0.506828	0.466184	0.0197033				0.00071156	0.506828	0.466184
granite Waldhambach	Dol	main filling of polyphased vein	0.0703654	27.2657	19.5181	1.76654	51.3794		0.000979337	0.486192	0.484319	0.0249019				0.000979337	0.486192	0.484319
granite Waldhambach	Dol	main filling of polyphased vein	0.457963	28.1016	18.4058	1.50584	51.5287		0.00637387	0.501099	0.45672	0.021227				0.00637387	0.501099	0.45672
granite Waldhambach	Dol	main filling of polyphased vein	0.451025	27.6464	19.5729	0.514815	51.8149		0.00627731	0.492981	0.485679	0.00725705				0.00627731	0.492981	0.485679
granite Waldhambach	Dol	main filling of polyphased vein	0.175356	28.4327	19.0432	1.2312	51.1175		0.00244058	0.507002	0.472537	0.0173555				0.00244058	0.507002	0.472537
granite Waldhambach	Dol	main filling of polyphased vein	0.0305959	28.2428	19.7371	0.375495	51.6141		0.00042583	0.503615	0.489754	0.00529313				0.00042583	0.503615	0.489754
granite Waldhambach	Dol	main filling of polyphased vein	0.983241	27.8518	19.3911	0.403848	51.37		0.0136846	0.496645	0.481168	0.0056928				0.0136846	0.496645	0.481168
granite Waldhambach	Dol	main filling of polyphased vein	0.29785	28.0349	19.5138	0.7844	51.369		0.00414544	0.499909	0.484214	0.0110572				0.00414544	0.499909	0.484214
granite Waldhambach	Dol	main filling of polyphased vein	0.460345	27.8161	19.4141	1.10316	51.2062		0.00640703	0.496008	0.481741	0.0155506				0.00640703	0.496008	0.481741
granite Waldhambach	Dol	main filling of polyphased vein	0	28.2663	19.2177	1.27446	51.2415		0	0.504035	0.476866	0.0179653				0	0.504035	0.476866
granite Waldhambach	Dol	main filling of polyphased vein	0.160992	27.7819	19.4659	1.25687	51.3343		0.00224067	0.495398	0.483024	0.0177173				0.00224067	0.495398	0.483024
granite Waldhambach	Dol	main filling of polyphased vein	0.604935	28.1067	19.0959	1.00823	51.1842		0.00841942	0.50119	0.473843	0.0142124				0.00841942	0.50119	0.473843
granite Waldhambach	Dol	main filling of polyphased vein	0.174944	28.2839	19.323	0.809347	51.4088		0.00243485	0.504349	0.47948	0.0114089				0.00243485	0.504349	0.47948
granite Waldhambach	Dol	main filling of polyphased vein	0.0225318	28.2107	19.4158	0.991397	51.3596		0.000313594	0.503044	0.481782	0.0139752				0.000313594	0.503044	0.481782
granite Waldhambach	Dol	main filling of polyphased vein	0.0747778	28.7259	18.8954	1.04969	51.2542		0.00104075	0.512231	0.468869	0.0147969				0.00104075	0.512231	0.468869
granite Waldhambach	Dol	main filling of polyphased vein	0.0999549	28.2816	19.2651	0.962182	51.3911		0.00139116	0.504309	0.478043	0.0135633				0.00139116	0.504309	0.478043
granite Waldhambach	Dol	main filling of polyphased vein	0.0390705	28.4749	18.9994	1.37026	51.1163		0.000543779	0.507756	0.47145	0.0193157				0.000543779	0.507756	0.47145
granite Waldhambach	Dol	main filling of polyphased vein	1.7575	27.9261	18.8769	0.473245	50.9663		0.0244607	0.497969	0.468409	0.00667106				0.0244607	0.497969	0.468409
granite Waldhambach	Dol	main filling of polyphased vein	0.150112	28.6705	18.8526	1.16547	51.1613		0.00208924	0.511243	0.467806	0.0164289				0.00208924	0.511243	0.467806
granite Waldhambach	Dol	main filling of polyphased vein	0.124659	28.4644	19.4055	0.610172	51.3952		0.00173499	0.507568	0.481527	0.00860124				0.00173499	0.507568	0.481527
granite Waldhambach	Dol	main filling of polyphased vein	0.239651	28.8507	18.4751	1.26986	51.1647		0.00333543	0.514456	0.458438	0.0179005				0.00333543	0.514456	0.458438
granite Waldhambach	Dol	main filling of polyphased vein	0.0637952	29.0725	18.6387	1.01787	51.2072		0.000887894	0.518412	0.462498	0.0143483				0.000887894	0.518412	0.462498
granite Waldhambach	Dol	main filling of polyphased vein	0.00759341	29.0059	18.7064	1.30322	50.9769		0.000105684	0.517223	0.464178	0.0183707				0.000105684	0.517223	0.464178
granite Waldhambach	Dol	main filling of polyphased vein	0.465102	28.7355	18.5584	1.29068	50.9503		0.00647324	0.512402	0.460507	0.018194				0.00647324	0.512402	0.460507
granite Waldhambach	Dol	main filling of polyphased vein	0.247694	28.7616	18.7816	0.544176	51.665		0.00344737	0.512867	0.466044	0.00767093				0.00344737	0.512867	0.466044
granite Waldhambach	Kutn	secondary filling in polyphased vein	4.76287	27.2995	13.9454	7.06346	46.9288		0.0662891	0.486795	0.346039	0.0995695				0.0662891	0.486795	0.346039
granite Waldhambach	Ank	secondary filling in polyphased vein	10.3428	28.3128	9.96307	7.1469	44.2345		0.143949	0.504864	0.247223	0.100746				0.143949	0.504864	0.247223
granite Waldhambach	Ank	secondary filling in polyphased vein	10.3551	31.2863	10.7634	2.04435	45.5508		0.144122	0.557887	0.267082	0.028818				0.144122	0.557887	0.267082
granite Waldhambach	Ank	secondary filling in polyphased vein	10.6047	30.9679	10.8652	2.09682	45.4653		0.147595	0.55221	0.269609	0.0295576				0.147595	0.55221	0.269609
granite Waldhambach	Ank	secondary filling in polyphased vein	10.9201	29.1131	10.6537	4.27848	45.0347		0.151985	0.519135	0.264359	0.0603112				0.151985	0.519135	0.264359
granite Waldhambach	Ank	secondary filling in polyphased vein	11.1523	28.5767	9.12701	7.59885	43.5451		0.155217	0.509571	0.226477	0.107117				0.155217	0.509571	0.226477
granite Waldhambach	Ank	secondary filling in polyphased vein	15.7574	29.0823	9.33439	2.05861	43.7672		0.21931	0.518586	0.231623	0.0290191				0.21931	0.518586	0.231623
granite Waldhambach	Ank	secondary filling in polyphased vein	17.6065	28.9885	8.02478	2.43165	42.9486		0.245045	0.516913	0.199126	0.0342776				0.245045	0.516913	0.199126
granite Waldhambach	Ank	secondary filling in polyphased vein	18.4609	31.1341	6.80044	1.07569	42.5289		0.256936	0.555172	0.168745	0.0151633				0.256936	0.555172	0.168745
granite Waldhambach	Ank	secondary filling in polyphased vein	24.6578	25.4561	5.86291	2.68219	41.3411		0.343184	0.453924	0.145482	0.0378092				0.343184	0.453924	0.145482
granite Waldhambach	Ank	secondary filling in polyphased vein	25.9524	24.6149	5.77173	2.76185	40.8992		0.361202	0.438924	0.143219	0.0389322				0.361202	0.438924	0.143219
granite Waldhambach	Ank	secondary filling in polyphased vein	26.0122	23.6075	6.77939	2.20888	41.3921		0.362034	0.42096	0.168223	0.0311374				0.362034	0.42096	0.168223
granite Waldhambach	Ank	secondary filling in polyphased vein	27.5343	23.705	5.71878	2.01488	41.027		0.38322	0.422699	0.141905	0.0284026				0.38322	0.422699	0.141905
granite Waldhambach	Ank	secondary filling in polyphased vein	28.1571	23.2021	5.40323	2.51519	40.7223		0.391887	0.413732	0.134075	0.0354552				0.391887	0.413732	0.134075
granite Waldhambach	Ank	secondary filling in polyphased vein	17.1793	29.0299	8.09906	1.86557	43.8262		0.2391	0.517651	0.200969	0.0262978				0.2391	0.517651	0.200969
granite Waldhambach	Ank	secondary filling in polyphased vein	6.34104	24.9922	17.9396	1.07092	49.6562		0.0882539	0.445653	0.445152	0.0150961				0.0882539	0.445653	0.445152
granite Waldhambach	Ank	secondary filling in polyphased vein	3.74738	26.49	18.3981	0.80769	50.5569		0.0521556	0.47236	0.456529	0.0113855				0.0521556	0.47236	0.456529
granite Waldhambach	Ank	secondary filling in polyphased vein	12.752	30.5123	9.09517	3.16202	44.4785		0.17748	0.544086	0.225687	0.0445731				0.17748	0.544086	0.225687
granite Waldhambach	Ank	secondary filling in polyphased vein	10.8994	31.3801	10.3456	2.01244	45.3625		0.151696	0.559559	0.256715	0.0283682				0.151696	0.559559	0.256715

## Sheet: EPMA on barite EPS1
sample	type	oxide contents in weight %					structural formulae calculated on the basis of 4 oxygen atoms
		BaO	SO3	SrO	Total		Ba	Sr	Ba + Sr	S	Ba/(Ba +Sr) %
EPS1-1169.9 m	sandstone matrix	66.384	34.065	0.551	101		1.00989	0.0124044	1.0223	0.992568	98.7866
EPS1-1169.9 m	sandstone matrix	66.731	32.332	0.695	99.063		1.0528	0.0162261	1.06903	0.976991	98.4822
EPS1-1169.9 m	sandstone matrix	63.925	34.283	0.94	98.208		0.974823	0.0212126	0.996035	1.00132	97.8703
EPS1-1169.9 m	sandstone matrix	65.433	34.74	1.21	100.173		0.980866	0.0268417	1.00771	0.997431	97.3364
EPS1-1169.9 m	sandstone matrix	65.133	32.098	1.083	97.231		1.03728	0.0255232	1.0628	0.979066	97.5985
EPS1-1169.9 m	sandstone matrix	62.633	33.199	2.777	95.832		0.972932	0.0638362	1.03677	0.987744	93.8428
EPS1-1169.9 m	sandstone matrix	66.639	32.215	0.661	98.854		1.05474	0.0154821	1.07022	0.976594	98.5534
EPS1-1169.9 m	sandstone matrix	61.267	34.15	4.476	95.417		0.927885	0.100316	1.0282	0.9906	90.2436
EPS1-1169.9 m	sandstone matrix	58.829	34.767	6.054	93.596		0.879499	0.133936	1.01343	0.995522	86.7839
EPS1-1169.9 m	sandstone matrix	60.903	32.387	4.131	93.29		0.962475	0.0966091	1.05908	0.980305	90.8781
EPS1-1169.9 m	sandstone matrix	62.448	33.631	3.121	96.079		0.959601	0.0709705	1.03057	0.98981	93.1135
EPS1-1169.9 m	sandstone matrix	64.632	33.196	1.386	97.828		1.00428	0.0318701	1.03615	0.987949	96.9242
EPS1-1169.9 m	sandstone matrix	65.867	33.841	0.421	99.708		1.00969	0.00955028	1.01924	0.993585	99.063
EPS1-1169.9 m	sandstone matrix	63.543	33.376	1.704	96.919		0.98577	0.0391191	1.02489	0.991704	96.1831
EPS1-1169.9 m	sandstone matrix	66.801	34.075	1.095	100.876		1.01132	0.0245318	1.03585	0.988051	97.6317
EPS1-1169.9 m	sandstone matrix	65.061	33.134	1.333	98.195		1.01097	0.0306521	1.04162	0.986125	97.0573
EPS1-1169.9 m	sandstone matrix	65.73	34.575	1.269	100.305		0.987405	0.0282101	1.01561	0.994795	97.2224
EPS1-1192.78 m	sandstone matrix	51.899	34.47	2.407	89.432		0.818843	0.0561991	0.875042	1.04165	93.5776
EPS1-1192.78 m	sandstone matrix	48.346	32.283	4.748	86.661		0.802862	0.116682	0.919543	1.02682	87.3109
EPS1-1192.78 m	sandstone matrix	47.13	37.119	3.022	87.908		0.711703	0.0675317	0.779235	1.07359	91.3336
EPS1-1192.78 m	sandstone matrix	49.125	34.624	3.39233	88.0003		0.777803	0.0801375	0.85794	1.04735	90.6593
EPS1-1194.04 m	sandstone matrix	47.161	32.917	4.056	85.301		0.778548	0.099086	0.877634	1.04079	88.7099
EPS1-1194.04 m	sandstone matrix	50.267	34.907	3.374	89.093		0.785933	0.0780656	0.863999	1.04533	90.9646
EPS1-1169.9 m	fracture	65.385	34.587	0.397	99.972		0.988035	0.00887762	0.996912	1.00103	99.1095
EPS1-1169.9 m	fracture	59.057	33.194	3.066	92.251		0.928843	0.07136	1.0002	0.999932	92.8654
EPS1-1173.6 m	fracture	62.814	34.15	3	96.964		0.953615	0.0673984	1.02101	0.992995	93.3989
EPS1-1173.6 m	fracture	61.507	34.138	2.971	95.645		0.938829	0.0671083	1.00594	0.998021	93.3288
EPS1-1173.6 m	fracture	62.64	32.615	3.589	95.255		0.981222	0.0831957	1.06442	0.978527	92.1839
EPS1-1173.6 m	fracture	60.056	34.385	3.461	94.441		0.914262	0.07797	0.992232	1.00259	92.142
EPS1-1173.6 m	fracture	63.542	34.118	3.411	97.66		0.960467	0.0762983	1.03676	0.987745	92.6407
EPS1-1173.6 m	fracture	63.522	33.431	3.503	96.953		0.97427	0.0795073	1.05378	0.982074	92.455
EPS1-1173.6 m	fracture	62.609	33.446	3.592	96.055		0.962833	0.0817452	1.04458	0.985141	92.1743
EPS1-1173.6 m	fracture	63.023	34.05	3.757	97.073		0.954056	0.0841642	1.03822	0.98726	91.8934
EPS1-1173.6 m	fracture	62.461	34.295	3.02	96.756		0.946425	0.0677167	1.01414	0.995286	93.3228
EPS1-1173.6 m	fracture	62.864	33.581	2.695	96.445		0.967859	0.0614017	1.02926	0.990247	94.0344
EPS1-1192.0 m	fracture	62.154	34.098	3.14	96.252		0.946295	0.0707455	1.01704	0.99432	93.044
EPS1-1192.0 m	fracture	62.252	34.145	2.945	96.397		0.9475	0.066332	1.01383	0.995389	93.4573
EPS1-1192.0 m	fracture	63.434	33.916	3.547	97.35		0.962717	0.0796617	1.04238	0.985874	92.3577
EPS1-1192.0 m	fracture	63.754	34.922	3.79	98.676		0.944426	0.0830829	1.02751	0.99083	91.9141
EPS1-1192.0 m	fracture	62.027	33.851	3.509	95.878		0.94797	0.0793614	1.02733	0.99089	92.275
EPS1-1192.0 m	fracture	64.994	34.208	2.485	99.202		0.980196	0.0554598	1.03566	0.988115	94.645
EPS1-1192.0 m	fracture	64.454	33.821	2.867	98.275		0.980177	0.06452	1.0447	0.985101	93.824
EPS1-1192.0 m	fracture	63.174	33.893	2.252	97.067		0.967244	0.0510244	1.01827	0.993911	94.9891
EPS1-1192.0 m	fracture	63.605	32.884	2.162	96.489		0.994784	0.0500386	1.04482	0.985059	95.2108
EPS1-1192.0 m	fracture	62.349	34.425	4.396	96.774		0.935264	0.097583	1.03285	0.989051	90.552
EPS1-1192.0 m	fracture	63.2197	34.0163	3.1093	97.236		0.960657	0.0697809	1.03044	0.989854	93.2269

## Sheet: EPMA on clay minerals
		oxide contents in weight %											structural formulae calculated on the basis of 11 oxygen atoms
sample	comments	Al2O3	CaO	FeO	K2O	MgO	MnO	Na2O	SiO2	TiO2	Total		Al	Ca	Fe	K	Mg	Mn	Na	Si	Ti		Si/4	Na + K	Fe + Mg
arkose Saint Pierre Bois	alt Kfs	30.193	0.094	1.052	8.754	1.426	0.03	0.294	49.129	0.022	88.455		2.43642	0.00689551	0.0602331	0.764596	0.145566	0.00173971	0.0390264	3.36343	0.00113272		0.840857	0.817413	0.145566
arkose Saint Pierre Bois	alt Kfs	31.26	0	6.18	9.426	3.128	0.003	0.614	42.934	0.161	85.443		2.56812	0	0.360237	0.838171	0.325078	0.000177115	0.0829772	2.99244	0.00843928		0.74811	0.921148	0.325078
arkose Saint Pierre Bois	alt Kfs	36.117	0	1.019	10.358	0.666	0	0.91	45.842	0	87.382		2.84021	0	0.0568573	0.881646	0.0662534	0	0.117719	3.05844	0		0.764611	0.999364	0.0662534
arkose Saint Pierre Bois	alt Kfs	34.35	0	1.293	10.395	1.393	0.124	0.636	46.02	0.054	84.665		2.72624	0	0.072813	0.892977	0.139857	0.00707241	0.0830345	3.09871	0.00273454		0.774678	0.976012	0.139857
arkose Saint Pierre Bois	Ms	30.785	0.021	4.75	10.426	3.814	0.066	0.259	44.57	0	87.742		2.49142	0.00154497	0.272756	0.913282	0.390466	0.00383849	0.0344804	3.06019	0		0.765047	0.950852	0.390466
arkose Saint Pierre Bois	Ms	31.528	0.005	3.509	10.815	3.011	0.082	0.232	45.693	0	87.829		2.52722	0.000364341	0.199573	0.938321	0.305317	0.00472355	0.0305913	3.10737	0		0.776843	0.969641	0.305317
arkose Saint Pierre Bois	Ms	33.601	0	1.67	10.961	1.531	0.033	0.279	48.004	0.002	87.926		2.61832	0	0.0923336	0.924484	0.150918	0.00184796	0.0357634	3.17355	9.94382e-05		0.793388	0.960247	0.150918
arkose Saint Pierre Bois	filling	27.79	0.033	1.423	8.475	1.94	0.019	0.051	45.769	0.015	80.951		2.39756	0.00258813	0.0871082	0.791407	0.211728	0.00117799	0.00723795	3.35004	0.000825706		0.83751	0.803821	0.211728
arkose Saint Pierre Bois	filling	29.666	0.058	1.569	9.502	1.999	0	0.032	48.403	0.017	88.428		2.40807	0.00427986	0.090366	0.83484	0.205266	0	0.00427291	3.33334	0.000880463		0.833334	0.847673	0.205266
arkose Saint Pierre Bois	filling	23.387	0.052	1.434	7.293	1.514	0	0.025	39.471	0.048	86.453		2.35879	0.00476771	0.102621	0.796159	0.193168	0	0.00414781	3.37746	0.00308894		0.844366	0.809843	0.193168
granite Waldhambach	polyphased vein	30.707	0.069	2.493	10.04	1.317	0	0.109	48.57	0.077	93.412		2.45473	0.00501426	0.141404	0.868718	0.133182	0	0.0143337	3.29406	0.00392744		0.823516	0.89308	0.133182
granite Waldhambach	polyphased vein	30.357	0.021	2.855	10.409	1.99	0	0.148	50.797	0.017	96.601		2.35047	0.00147811	0.156846	0.872335	0.194914	0	0.0188504	3.33681	0.000839841		0.834201	0.894141	0.194914
granite Waldhambach	polyphased vein	29.428	0.116	3.283	10.434	1.894	0.001	0.089	50.027	0.017	95.337		2.31855	0.00830819	0.183527	0.889787	0.188769	5.66194e-05	0.0115348	3.34394	0.000854591		0.835985	0.917938	0.188769
granite Waldhambach	polyphased vein	28.587	0.109	3.552	10.97	2.417	0	0.1	50.926	0.065	96.747		2.22897	0.007726	0.196509	0.92581	0.238401	0	0.0128263	3.36879	0.00323372		0.842197	0.954088	0.238401
granite Waldhambach	polyphased vein	29.859	0	2.624	10.28	1.729	0	0.053	47.618	0.025	92.188		2.42803	0	0.151396	0.904795	0.177856	0	0.00708954	3.28509	0.00129709		0.821272	0.911884	0.177856
granite Waldhambach	polyphased vein	30.167	0.16	2.581	10.07	1.348	0	0.094	46.765	0.127	91.312		2.47691	0.0119424	0.150363	0.894926	0.140011	0	0.0126961	3.2576	0.00665328		0.814399	0.931507	0.140011
granite Waldhambach	polyphased vein	26.537	0.057	2.991	10.581	1.776	0.044	0.111	42.85	0.205	85.152		2.37237	0.00463231	0.189723	1.02385	0.200848	0.00282678	0.0163237	3.24997	0.0116933		0.812492	1.04944	0.200848
granite Waldhambach	polyphased vein	27.189	0.031	3.473	11.021	1.905	0	0.133	43.967	0.13	87.849		2.36373	0.00244996	0.214232	1.03706	0.209505	0	0.0190205	3.24287	0.00721111		0.810718	1.06098	0.209505
granite Waldhambach	polyphased vein	26.679	0	3.043	10.747	1.874	0	0.093	43.898	0.107	86.501		2.34619	0	0.189876	1.02296	0.208477	0	0.0134537	3.27519	0.00600387		0.818798	1.03642	0.208477
granite Waldhambach	polyphased vein	27.599	0.098	2.821	10.134	1.328	0.05	0.065	43.267	0.015	85.377		2.44481	0.00789168	0.177308	0.971653	0.148814	0.00318295	0.00947173	3.25167	0.000847805		0.812917	0.996908	0.148814
granite Waldhambach	polyphased vein	16.162	4.483	3.651	6.158	2.262	0.316	0.075	50.325	0.082	83.514		1.44671	0.364793	0.231884	0.596629	0.256138	0.0203274	0.0110436	3.8218	0.00468331		0.955449	1.33726	0.256138
granite Waldhambach	polyphased vein	27.1	0.091	2.941	10.488	1.3	0.088	0.163	42.163	0.117	84.47		2.44275	0.00745664	0.188095	1.02325	0.148234	0.00570034	0.0241692	3.22433	0.00672897		0.806081	1.06233	0.148234
granite Waldhambach	polyphased vein	24.67	0.146	3.407	10.608	2.026	0.056	0.142	43.032	0.088	84.187		2.23998	0.0120509	0.219493	1.04253	0.232707	0.00365402	0.0212094	3.31485	0.00509813		0.828713	1.08784	0.232707
sandstones EPS1-1169.87 m		35.185	0	1.066	10.534	0.759	0	0.608	46.776	0.52	95.55		2.75024	0	0.0591213	0.891222	0.0750499	0	0.0781775	3.10195	0.025934		0.775487	0.9694	0.0750499
sandstones EPS1-1169.87 m		30.956	0.126	2.251	9.126	1.641	0	0.082	52.043	0	96.225		2.37237	0.0087781	0.122402	0.757003	0.15909	0	0.0103375	3.38375	0		0.845937	0.784897	0.15909
sandstones EPS1-1173.56 m	filling	23.676	0.264	2.512	8.057	1.351	0.031	0.142	42.326	0.032	81.301		2.25283	0.0228358	0.169595	0.829798	0.162619	0.00211978	0.0222266	3.41684	0.00194278		0.854211	0.897696	0.162619
sandstones EPS1-1173.56 m		25.298	0.12	1.615	8.339	1.418	0.022	0.063	43.297	0	82.05		2.33764	0.0100801	0.105886	0.834036	0.165754	0.00146091	0.00957627	3.39428	0		0.848569	0.863772	0.165754
sandstones EPS1-1173.56 m		25.944	0.182	1.999	8.799	1.436	0	0.049	44.328	0.027	83.408		2.33217	0.0148726	0.1275	0.856123	0.163295	0	0.00724576	3.38065	0.00154861		0.845161	0.893114	0.163295
sandstones EPS1-1173.56 m	filling	25.33	0.224	2.579	7.83	1.33	0.028	0.224	43.665	0.03	83.663		2.31648	0.0186223	0.167347	0.775059	0.153865	0.00184018	0.0336982	3.38786	0.00175053		0.846965	0.846002	0.153865
sandstones EPS1-1173.56 m		26.871	0.14	2.044	9.02	1.504	0	0.053	44.807	0	85.672		2.36958	0.011223	0.127892	0.860941	0.167776	0	0.00768826	3.35221	0		0.838053	0.891075	0.167776
sandstones EPS1-1173.56 m	filling	25.966	0.227	3.118	9.348	1.477	0.026	0.124	47.109	0.088	88.071		2.22343	0.01767	0.189438	0.866394	0.15999	0.00159993	0.0174664	3.42231	0.00480788		0.855577	0.9192	0.15999
sandstones EPS1-1173.56 m	filling	27.606	0.134	2.422	9.072	1.608	0	0.164	46.296	0.085	88.579		2.35416	0.010388	0.146548	0.837366	0.173466	0	0.023006	3.34946	0.00462493		0.837364	0.881148	0.173466
sandstones EPS1-1173.56 m	filling	25.107	0.183	2.573	8.259	1.336	0.107	0.148	41.667	7.945	89.347		2.1772	0.014426	0.158313	0.775194	0.146557	0.00666801	0.021112	3.06545	0.439593		0.766362	0.825158	0.146557
sandstones EPS1-1173.56 m	filling	28.016	0.222	2.2	9.085	1.743	0	0.133	48.742	0.027	91.476		2.304	0.0165967	0.128372	0.808686	0.181329	0	0.0179925	3.40077	0.00141675		0.850192	0.859871	0.181329
sandstones EPS1-1173.56 m		28.032	0.21	1.958	9.301	1.791	0.048	0.059	48.59	0.015	91.913		2.31016	0.0157325	0.114492	0.829653	0.186715	0.00284274	0.00799842	3.39729	0.000788737		0.849322	0.869116	0.186715
sandstones EPS1-1173.56 m	filling	28.965	0.154	2.776	8.99	1.497	0	0.204	47.941	0.168	92.234		2.37694	0.0114883	0.161636	0.798516	0.155404	0	0.0275385	3.33772	0.00879645		0.83443	0.849031	0.155404
sandstones EPS1-1173.56 m	filling	29.26	0.119	2.276	8.785	1.542	0	0.311	48.41	0.092	92.676		2.3871	0.00882543	0.131748	0.775743	0.159139	0	0.0417371	3.35066	0.00478893		0.837664	0.835131	0.159139
sandstones EPS1-1173.56 m		28.604	0.164	2.021	9.173	1.638	0	0.04	49.225	0.028	92.745		2.32865	0.0121371	0.116739	0.808292	0.168689	0	0.00535676	3.39986	0.00145442		0.849965	0.837923	0.168689
sandstones EPS1-1173.56 m		28.623	0.201	1.895	9.274	1.879	0.022	0.053	49.606	0.013	93.045		2.31332	0.0147675	0.108668	0.811271	0.192106	0.00127777	0.00704628	3.40135	0.000670373		0.850338	0.847852	0.192106
sandstones EPS1-1173.56 m		29.041	0.153	2.009	9.65	1.835	0	0	49.552	0	93.513		2.33604	0.011188	0.114662	0.840184	0.186724	0	0	3.38164	0		0.84541	0.86256	0.186724
sandstones EPS1-1173.56 m	filling	29.292	0.189	2.289	9.155	1.491	0.049	0.177	48.451	0.153	93.891		2.3839	0.0139827	0.132178	0.806447	0.153501	0.00286578	0.0236961	3.34533	0.00794481		0.836333	0.858109	0.153501
sandstones EPS1-1173.56 m		28.833	0.091	2.54	10.273	1.635	0.088	0.131	49.649	0	93.941		2.31207	0.00663352	0.144517	0.891635	0.165853	0.0050711	0.0172801	3.37768	0		0.844421	0.922182	0.165853
sandstones EPS1-1173.56 m		28.939	0.228	1.859	9.161	1.927	0	0.074	50.992	0.035	94.345		2.29082	0.0164072	0.104414	0.784927	0.192968	0	0.00963615	3.42458	0.00176778		0.856145	0.827378	0.192968
sandstones EPS1-1173.56 m	filling	30.586	0.118	2.515	8.856	1.59	0	0.278	50.175	0.148	95.247		2.40098	0.00842053	0.14008	0.752458	0.157891	0	0.0358983	3.34157	0.00741276		0.835392	0.805197	0.157891
sandstones EPS1-1173.56 m		30.044	0.269	2.039	9.105	1.753	0	0.074	50.898	0.002	95.864		2.35507	0.0191686	0.113406	0.772511	0.173829	0	0.00954205	3.38488	0.00010003		0.846221	0.82039	0.173829
sandstones EPS1-1173.56 m	filling	24.561	0.208	2.179	7.27	1.335	0	0.177	39.724	19.996	97.655		1.96824	0.0151526	0.123897	0.630586	0.135334	0	0.0233329	2.70073	1.02242		0.675184	0.684225	0.135334
sandstones EPS1-1174.39 m		33.367	0	1.317	10.205	1.013	0.146	0.566	45.552	0.137	92.468		2.70225	0	0.0756775	0.89454	0.10378	0.00849707	0.075403	3.12977	0.00707915		0.782443	0.969943	0.10378
sandstones EPS1-1174.39 m		25.01	0.024	2.988	9.652	2.507	0.087	0.371	51.948	0.224	93.259		2.0103	0.00175368	0.170412	0.839738	0.254916	0.00502546	0.0490553	3.54253	0.0114881		0.885633	0.892301	0.254916
sandstones EPS1-1174.39 m		27.578	0.038	3.872	9.912	3.056	0.019	0.422	50.639	0.219	96.497		2.16479	0.00271162	0.215656	0.842158	0.30346	0.0010718	0.0544916	3.37238	0.0109686		0.843094	0.902073	0.30346
sandstones EPS1-1190.75 m		21.8	0.013	2.503	10.273	0.89	0	0.034	54.246	0	89.804		1.79969	0.00097561	0.146614	0.917946	0.092945	0	0.00461726	3.79932	0		0.949831	0.924515	0.092945
sandstones EPS1-1208.66 m	filling	25.337	0.306	1.98	8.484	1.497	0	0.144	42.897	0.002	81.499		2.34047	0.0256957	0.129773	0.848256	0.17493	0	0.0218813	3.3618	0.000117877		0.84045	0.921528	0.17493
sandstones EPS1-1208.66 m	filling	25.169	0.322	2.168	8.38	1.585	0	0.131	43.402	0	81.653		2.30954	0.02686	0.141153	0.832304	0.183985	0	0.019774	3.37883	0		0.844707	0.905798	0.183985
sandstones EPS1-1208.66 m	filling	25.143	0.218	2.57	8.934	1.494	0.005	0.098	43.485	0.027	82.745		2.29779	0.018111	0.166648	0.883729	0.172719	0.000328377	0.0147328	3.37156	0.00157438		0.84289	0.934683	0.172719
sandstones EPS1-1208.66 m	filling	22.431	0.092	2.039	7.849	1.119	0	0.178	48.515	0.03	83.168		2.00042	0.00745851	0.129022	0.757645	0.12624	0	0.026113	3.67068	0.00170705		0.917669	0.798675	0.12624
sandstones EPS1-1208.66 m	filling	24.506	0.211	2.199	8.295	1.302	0	0.077	47.55	0.023	84.97		2.14927	0.0168226	0.136841	0.787433	0.144452	0	0.011109	3.53807	0.00128706		0.884517	0.832187	0.144452
sandstones EPS1-1208.66 m	filling	25.367	0.221	1.856	8.307	1.449	0	0.442	43.408	2.746	85.031		2.26089	0.0179059	0.117371	0.801372	0.163371	0	0.0648034	3.2823	0.156158		0.820576	0.901988	0.163371
sandstones EPS1-1208.66 m	filling	26.133	0.245	2.433	9.414	1.84	0	0.104	44.797	0	85.575		2.30584	0.0196516	0.152319	0.899068	0.205377	0	0.0150951	3.35341	0		0.838352	0.953467	0.205377
sandstones EPS1-1208.66 m	filling	27.085	0.325	2.139	8.543	1.539	0	0.143	45.608	0	86.783		2.35493	0.0256876	0.131957	0.803966	0.169271	0	0.0204526	3.36424	0		0.841061	0.875794	0.169271
sandstones EPS1-1208.66 m	filling	26.932	0.176	2.709	9.024	1.333	0	0.109	46.155	0	87.481		2.32437	0.0138083	0.165889	0.842973	0.145533	0	0.0154749	3.3795	0		0.844875	0.886065	0.145533
sandstones EPS1-1208.66 m	filling	27.769	0.248	1.768	8.738	1.539	0.014	0.139	46.735	0.013	87.871		2.36333	0.019187	0.106763	0.804924	0.16569	0.00085625	0.01946	3.37445	0.000705927		0.843614	0.862758	0.16569
sandstones EPS1-1208.66 m	filling	27.412	0.262	2.175	9.142	1.716	0.039	0.173	47.015	0	88.493		2.32015	0.0201589	0.130619	0.837519	0.183733	0.00237218	0.0240871	3.37605	0		0.844012	0.901924	0.183733
sandstones EPS1-1208.66 m	filling	27.839	0.102	2.278	9.486	1.557	0	0.144	48.153	0.062	90.217		2.31162	0.00769936	0.134211	0.852559	0.163548	0	0.0196693	3.39222	0.00328479		0.848054	0.887627	0.163548
sandstones EPS1-1208.66 m	filling	28.205	0.141	2.031	9.215	1.668	0	0.155	48.645	0.013	90.511		2.32126	0.0105489	0.118599	0.820864	0.173655	0	0.0209842	3.39651	0.000682643		0.849128	0.862946	0.173655
sandstones EPS1-1208.66 m	filling	28.789	0.095	1.88	9.398	1.65	0.014	0.142	48.934	0	91.086		2.34691	0.00704019	0.108743	0.829246	0.170156	0.000820174	0.0190424	3.38437	0		0.846092	0.862369	0.170156
sandstones EPS1-1208.66 m	filling	28.179	0.192	2.65	9.443	1.728	0	0.128	48.258	0.02	91.784		2.31954	0.0143671	0.154773	0.841326	0.179934	0	0.017332	3.3701	0.00105041		0.842524	0.887392	0.179934
sandstones EPS1-1208.66 m	filling	30.76	0.186	1.368	8.563	1.555	0	0.117	48.816	0	92.035		2.47325	0.0135952	0.0780443	0.745224	0.158164	0	0.0154751	3.32998	0		0.832496	0.78789	0.158164
sandstones EPS1-1208.66 m	clast	33.6	0	1.182	10.951	0.711	0.006	0.404	44.917	0.127	92.134		2.74229	0	0.0684486	0.967401	0.0734071	0.000351912	0.05424	3.11016	0.00661349		0.777539	1.02164	0.0734071
sandstones EPS1-1208.66 m	clast	34.652	0	1.14	10.664	0.564	0.003	0.547	44.585	0.117	92.272		2.81257	0	0.0656529	0.93686	0.0579095	0.000174987	0.0730344	3.07017	0.00605919		0.767542	1.00989	0.0579095
sandstones EPS1-1208.66 m	clast	33.471	0	1.488	10.714	0.857	0	0.302	45.043	0.127	92.376		2.7276	0	0.0860375	0.945023	0.0883461	0	0.040484	3.11413	0.00660341		0.778532	0.985507	0.0883461
sandstones EPS1-1208.66 m	clast	33.235	0.049	1.007	10.046	0.859	0.022	0.464	45.451	1.488	92.805		2.67726	0.00358825	0.0575569	0.875925	0.0875352	0.00127358	0.0614861	3.10625	0.0764805		0.776561	0.944587	0.0875352
sandstones EPS1-1208.66 m	filling	29.5	0.273	1.962	9.258	2.061	0.028	0.09	49.52	0	93.008		2.35782	0.0198355	0.111266	0.800913	0.208383	0.00160826	0.011833	3.3579	0		0.839475	0.852417	0.208383
sandstones EPS1-1208.66 m	clast	32.967	0.003	1.566	10.788	1.069	0	0.259	46.016	0.285	93.022		2.65841	0.000219916	0.0895999	0.941592	0.109047	0	0.0343563	3.14811	0.0146636		0.787027	0.976388	0.109047
sandstones EPS1-1208.66 m	filling	27.589	0.178	2.067	9.314	1.693	0	0.179	47.086	4.409	93.076		2.23372	0.013101	0.118742	0.816221	0.173398	0	0.0238402	3.23431	0.227764		0.808578	0.866263	0.173398
sandstones EPS1-1208.66 m	filling	32.466	0.104	0.978	8.668	1.245	0	0.096	49.172	0.007	93.121		2.56416	0.00746693	0.0548061	0.740994	0.124389	0	0.0124725	3.29483	0.000352751		0.823707	0.768401	0.124389
sandstones EPS1-1208.66 m	clast	33.124	0	1.133	10.664	0.862	0.014	0.388	45.667	1.344	93.259		2.66186	0	0.064602	0.92756	0.0876284	0.000808499	0.0512907	3.11346	0.0689121		0.778365	0.978851	0.0876284
sandstones EPS1-1208.66 m	clast	34.866	0	1.276	10.628	0.643	0	0.47	45.135	0.289	93.338		2.79723	0	0.0726355	0.922903	0.0652576	0	0.062028	3.07211	0.0147937		0.768027	0.984931	0.0652576
sandstones EPS1-1208.66 m	clast	33.91	0.038	1.747	10.732	0.929	0.018	0.325	45.751	0.092	93.591		2.71973	0.0027706	0.0994177	0.93166	0.0942558	0.00103748	0.0428791	3.11312	0.00470802		0.77828	0.98008	0.0942558
sandstones EPS1-1208.66 m	filling	27.574	0.137	2.042	9.13	1.665	0.059	0.085	52.858	0.028	93.943		2.16934	0.00979806	0.113987	0.777459	0.165705	0.00333571	0.0110005	3.52806	0.00140553		0.882015	0.808056	0.165705
sandstones EPS1-1208.66 m	clast	35.808	0.034	0.817	10.403	0.517	0.093	0.582	45.862	0.037	94.362		2.83337	0.00244565	0.0458689	0.890966	0.0517498	0.00528829	0.0757549	3.07875	0.00186801		0.769687	0.971612	0.0517498
sandstones EPS1-1208.66 m	filling	29.995	0.085	2.842	10.129	1.539	0	0.075	49.086	0.143	94.446		2.39008	0.00615708	0.16068	0.873594	0.155131	0	0.00983082	3.31833	0.00727031		0.829582	0.895739	0.155131
sandstones EPS1-1208.66 m	filling	30.133	0.126	2.073	9.858	1.754	0.009	0.038	50.139	0.025	94.696		2.37636	0.00903299	0.115996	0.841467	0.174982	0.000510059	0.00492966	3.35461	0.00125795		0.838654	0.864463	0.174982
sandstones EPS1-1208.66 m	filling	28.559	0.08	3.048	9.566	1.895	0	0.04	50.459	0	94.842		2.27152	0.00578435	0.172013	0.823535	0.190668	0	0.00523356	3.40494	0		0.851234	0.840338	0.190668
sandstones EPS1-1208.66 m	filling	29.381	0.744	2.335	8.19	1.625	0.01	0.086	52.477	0.038	95.439		2.27501	0.0523699	0.128285	0.686404	0.159171	0.000556449	0.0109542	3.44733	0.00187739		0.861834	0.802098	0.159171
sandstones EPS1-1208.66 m	filling	31.246	0.189	1.648	9.249	1.913	0.001	0.077	51.542	0	95.967		2.40093	0.013202	0.0898494	0.769234	0.185949	5.52196e-05	0.00973284	3.36003	0		0.840009	0.805371	0.185949
sandstones EPS1-1208.77 m	filling	25.453	0.112	2.164	8.726	1.383	0	0.105	42.215	0	80.725		2.37264	0.00949079	0.143127	0.880413	0.163083	0	0.0161007	3.33854	0		0.834636	0.915496	0.163083
sandstones EPS1-1208.77 m	coating	21.052	0.221	3.287	8.045	1.809	0	0.135	46.166	0.06	81.466		1.9415	0.018528	0.215088	0.803061	0.211046	0	0.0204805	3.61213	0.00353059		0.903032	0.860597	0.211046
sandstones EPS1-1208.77 m	filling	24.893	0.167	2.503	8.342	2.597	0	0.078	42.649	0.018	82.097		2.29101	0.013972	0.16345	0.830997	0.302355	0	0.0118089	3.33009	0.001057		0.832524	0.870749	0.302355
sandstones EPS1-1208.77 m	filling	23.03	0.269	4.28	8.108	2.051	0.023	0.198	43.674	0.077	82.651		2.12539	0.0225678	0.280261	0.809913	0.239445	0.00152539	0.030059	3.41953	0.00453408		0.854882	0.885107	0.239445
sandstones EPS1-1208.77 m	filling	26.7	0.294	2.316	8.298	1.703	0.056	0.043	45.086	0.028	85.695		2.3455	0.0234781	0.144356	0.789	0.189249	0.00353526	0.0062138	3.36019	0.00156941		0.840048	0.84217	0.189249
sandstones EPS1-1208.77 m	filling	23.703	0.245	4.07	8.756	1.673	0.028	0.155	46.097	0.005	85.773		2.10454	0.0197748	0.256402	0.841469	0.187907	0.00178657	0.0226386	3.47235	0.000283254		0.868088	0.903657	0.187907
sandstones EPS1-1208.77 m		25.211	0.245	2.892	8.987	1.756	0	0.209	45.738	0.015	85.975		2.21901	0.0196032	0.18061	0.856177	0.195519	0	0.0302608	3.41542	0.000842392		0.853856	0.925644	0.195519
sandstones EPS1-1208.77 m	coating	25.279	0.257	4.132	8.436	1.479	0	0.125	45.207	0.052	86.043		2.23535	0.0206591	0.25925	0.807423	0.165443	0	0.0181828	3.39148	0.00293388		0.847869	0.866924	0.165443
sandstones EPS1-1208.77 m		25.553	0.361	3.391	9.457	1.842	0.037	0.249	45.584	0.007	86.942		2.22907	0.0286274	0.209886	0.892925	0.203267	0.00231949	0.0357311	3.37359	0.000389613		0.843398	0.98591	0.203267
sandstones EPS1-1208.77 m	coating	26.671	0.238	2.304	8.646	2.071	0.045	0.104	46.044	0.055	87.184		2.30154	0.0186702	0.14107	0.807558	0.226076	0.00279062	0.0147631	3.37093	0.00302827		0.842733	0.859661	0.226076
sandstones EPS1-1208.77 m	filling	26.996	0.229	2.06	9.052	1.607	0.066	0.073	46.677	0	87.505		2.31267	0.0178337	0.125214	0.839339	0.174151	0.00406319	0.0102873	3.39246	0		0.848115	0.885294	0.174151
sandstones EPS1-1208.77 m		24.34	0.332	3.31	8.302	3.295	0.097	0.251	47.809	0.075	89.017		2.07045	0.0256728	0.199776	0.764372	0.354563	0.00592958	0.0351222	3.45025	0.00407059		0.862563	0.85084	0.354563
sandstones EPS1-1208.77 m	filling	26.18	0.234	3.898	8.809	1.847	0.031	0.117	47.152	0	89.263		2.22417	0.018072	0.23497	0.810034	0.198499	0.00189264	0.0163511	3.39856	0		0.849641	0.862529	0.198499
sandstones EPS1-1208.77 m	filling	27.486	0.27	2.43	9.197	1.743	0.015	0.117	47.802	0.003	89.276		2.29743	0.0205157	0.144116	0.832064	0.184299	0.000901014	0.0160872	3.38981	0.000159995		0.847453	0.889183	0.184299
sandstones EPS1-1208.77 m	filling	27.784	0.194	2.237	8.84	1.811	0.037	0.108	47.443	0.067	89.754		2.32916	0.0147842	0.133059	0.802114	0.192052	0.00222903	0.0148934	3.37423	0.00358371		0.843558	0.846576	0.192052
sandstones EPS1-1208.77 m	filling	27.837	0.15	2.133	9.051	1.802	0.009	0.116	48.014	0.023	90.038		2.31652	0.0113474	0.125944	0.815247	0.189698	0.000538227	0.0158795	3.38984	0.00122122		0.84746	0.853822	0.189698
sandstones EPS1-1208.77 m	filling	28.44	0.115	2.036	8.843	1.709	0.019	0.067	47.77	0.022	90.291		2.36446	0.00869145	0.120103	0.795758	0.179738	0.00113518	0.00916308	3.36942	0.00116702		0.842356	0.822304	0.179738
sandstones EPS1-1208.77 m		26.573	0.392	3.265	9.127	1.976	0.012	0.212	47.749	0.525	90.337		2.21703	0.0297309	0.19328	0.82421	0.208551	0.000719483	0.0290958	3.37981	0.0279475		0.844953	0.912768	0.208551
sandstones EPS1-1208.77 m		22.715	0.239	3.023	7.997	1.486	0.005	0.179	54.053	0.092	90.4		1.85598	0.0177521	0.175255	0.707239	0.153594	0.000293588	0.024059	3.74695	0.00479624		0.936737	0.766802	0.153594
sandstones EPS1-1208.77 m	filling	28.553	0.215	2.182	9.255	1.716	0.013	0.096	48.284	0	91.03		2.34796	0.016072	0.127311	0.823747	0.178505	0.000768228	0.012986	3.36852	0		0.84213	0.868877	0.178505
sandstones EPS1-1208.77 m	filling	26.881	0.273	4.548	9.102	1.928	0	0.144	48.023	0.087	91.345		2.22532	0.0205448	0.267141	0.815572	0.201906	0	0.0196098	3.37282	0.00459536		0.843206	0.876272	0.201906
sandstones EPS1-1208.77 m		27.348	0.036	3.372	9.586	2.311	0	0.224	47.71	0.28	91.36		2.26095	0.00270557	0.1978	0.857791	0.241691	0	0.0304633	3.34636	0.0147699		0.836589	0.893666	0.241691
sandstones EPS1-1208.77 m		26.581	0.346	3.533	9.225	2.338	0.019	0.253	48.66	0.077	91.583		2.18973	0.0259111	0.206507	0.822553	0.243645	0.00112481	0.0342849	3.40086	0.00404727		0.850214	0.90866	0.243645
sandstones EPS1-1208.77 m	clast	33.424	0.013	0.961	9.822	0.992	0.034	0.38	45.894	0.112	91.677		2.70834	0.000957591	0.0552512	0.861438	0.101684	0.00197985	0.0506516	3.15499	0.0057905		0.788749	0.914005	0.101684
sandstones EPS1-1208.77 m	filling	27.461	0.371	3.473	8.938	1.957	0	0.075	48.378	0	91.719		2.26347	0.0277987	0.203113	0.797404	0.204054	0	0.0101691	3.38302	0		0.845755	0.86317	0.204054
sandstones EPS1-1208.77 m	clast	33.241	0	0.974	9.778	0.899	0.025	0.442	46.093	0.037	91.792		2.69614	0	0.0560531	0.858414	0.0922406	0.00145719	0.0589731	3.17176	0.0019148		0.79294	0.917387	0.0922406
sandstones EPS1-1208.77 m	filling	26.862	0.327	3.93	9.051	1.968	0	0.058	48.712	0.025	91.928		2.21335	0.0244935	0.229761	0.80721	0.205131	0	0.00786146	3.40522	0.00131433		0.851304	0.864058	0.205131
sandstones EPS1-1208.77 m	filling	29.449	0.232	2.047	9.222	1.958	0.022	0.105	50.021	0.002	93.196		2.34256	0.0167764	0.115534	0.794006	0.197028	0.00125762	0.0137396	3.37575	0.000101509		0.843936	0.841298	0.197028
sandstones EPS1-1208.77 m	filling	28.922	0.193	2.181	8.986	2.034	0.052	0.121	50.134	0	93.251		2.30963	0.0140108	0.123579	0.776712	0.205476	0.00298419	0.0158951	3.3966	0		0.84915	0.820628	0.205476
sandstones EPS1-1208.77 m	filling	29.411	0.302	2.704	9.174	2.079	0	0.062	51.022	0	95.096		2.30217	0.0214895	0.150178	0.777257	0.205862	0	0.00798331	3.3883	0		0.847075	0.828219	0.205862
sandstones EPS1-1208.94 m	coating	27.172	0.245	3.241	9.143	1.711	0.035	0.124	47.135	0.108	89.502		2.28798	0.0187537	0.193634	0.833293	0.182253	0.00211791	0.0171758	3.36722	0.00580239		0.841804	0.887976	0.182253
sandstones EPS1-1208.94 m	filling	27.99	0.407	2.891	8.991	2.049	0	0.293	48.686	0.103	91.873		2.28327	0.0301814	0.16733	0.793854	0.211442	0	0.0393175	3.36942	0.00536097		0.842355	0.893534	0.211442
sandstones EPS1-1210.16 m		24.379	0.063	2.448	7.754	1.56	0	0.016	42.386	0	82.053		2.30256	0.00540912	0.164051	0.792682	0.186386	0	0.00248587	3.39637	0		0.849092	0.805987	0.186386
sandstones EPS1-1210.16 m		25.08	0.208	1.837	8.275	1.535	0	0.082	44.579	0.023	83.969		2.27491	0.0171511	0.118228	0.812427	0.176133	0	0.0122353	3.43056	0.00133112		0.857641	0.858964	0.176133
sandstones EPS1-1210.16 m		24.629	0.448	2.1	8.5	1.501	0.094	0.137	42.486	0.015	84.454		2.30317	0.0380846	0.139339	0.860353	0.177564	0.00631707	0.0210748	3.37072	0.000895001		0.84268	0.957597	0.177564
sandstones EPS1-1210.16 m		25.863	0.249	1.841	8.526	1.632	0	0.063	44.583	0	86.314		2.3185	0.0202918	0.1171	0.827281	0.185073	0	0.00929038	3.39075	0		0.847687	0.877155	0.185073
sandstones EPS1-1210.16 m		26.494	0.264	1.901	8.73	1.331	0.031	0.243	45.145	0.072	86.521		2.33795	0.0211779	0.119026	0.833836	0.14858	0.00196588	0.0352743	3.37983	0.0040539		0.844958	0.911467	0.14858
sandstones EPS1-1210.16 m		26.286	0.325	1.823	8.821	1.474	0	0.093	45.633	0.018	87.147		2.30974	0.0259606	0.113658	0.83895	0.163844	0	0.0134427	3.40185	0.00100917		0.850464	0.904313	0.163844
sandstones EPS1-1210.16 m		24.878	0.194	3.179	8.029	1.791	0.017	0.08	45.237	0.01	87.333		2.2211	0.0157451	0.20138	0.775878	0.202276	0.00109071	0.0117492	3.42645	0.000569647		0.856613	0.819118	0.202276
sandstones EPS1-1210.16 m		27.011	0.2	2.116	8.828	1.731	0	0.057	46.333	0.028	89.671		2.32367	0.0156407	0.129159	0.822007	0.188376	0	0.00806628	3.3816	0.0015369		0.8454	0.861355	0.188376
sandstones EPS1-1210.16 m	filling	25.109	0.493	0.548	2.78	0.623	0	0.736	54.777	0.052	89.744		2.0549	0.0366776	0.0318211	0.246255	0.0644978	0	0.0990841	3.80327	0.0027153		0.950819	0.418694	0.0644978
sandstones EPS1-1210.16 m		25.874	0.179	2.484	8.524	1.429	0	0.069	44.074	0.057	90.496		2.33155	0.0146631	0.15882	0.831388	0.162895	0	0.0102281	3.36947	0.00327725		0.842367	0.870942	0.162895
sandstones EPS1-1210.16 m		25.483	0.165	2.94	8.808	1.845	0.088	0.113	46.215	0	92.917		2.22233	0.0130808	0.181919	0.83141	0.20354	0.00551506	0.0162107	3.41932	0		0.854829	0.873782	0.20354
sandstones EPS1-1210.16 m		24.498	0.513	5.484	10.597	1.787	0.012	0.34	53.45	0.112	96.793		1.92176	0.0365829	0.305238	0.899768	0.177332	0.000676486	0.0438745	3.55725	0.00560583		0.889312	1.01681	0.177332
granite EPS1-1418m	filling fracture	27.837	0.211	3.157	9.333	2.063	0.05	0.088	51.133	0.12	93.992		2.20497	0.0151934	0.17743	0.800167	0.206716	0.00284616	0.0114664	3.43621	0.00606477		0.859052	0.84202	0.206716
granite EPS1-1418m	filling fracture	22.962	0.683	8.491	9.417	5.049	0.217	0.065	45.284	1.828	93.996		1.9142	0.0517596	0.502239	0.849709	0.53245	0.0130001	0.00891366	3.20274	0.0972317		0.800684	0.962142	0.53245
granite EPS1-1434m	filling fracture	28.884	0.067	3.507	10.452	2.225	0.044	0.097	47.7	0.497	93.473		2.33571	0.00492525	0.20122	0.914829	0.227607	0.00255696	0.0129032	3.27249	0.0256431		0.818121	0.937583	0.227607
granite EPS1-1434m	filling fracture	26.796	0.102	3.537	9.114	1.845	0.072	0.088	41.979	0.167	83.7		2.42339	0.00838583	0.226967	0.892159	0.211079	0.00467946	0.0130919	3.22095	0.0096366		0.805237	0.922022	0.211079
granite EPS1-1434m	filling fracture	29.815	0.083	3.52	9.867	2.092	0	0.112	49.107	0.135	94.731		2.36166	0.00597658	0.197833	0.845955	0.209623	0	0.0145937	3.30008	0.00682291		0.825019	0.872501	0.209623
granite EPS1-2158 m	filling fracture	32.16	0.064	2.323	8.686	1.822	0.053	0.027	48.38	0	93.515		2.54315	0.00460074	0.13034	0.743456	0.182263	0.0030119	0.00351224	3.24579	0		0.811446	0.756169	0.182263
granite EPS1-2161 m	filling fracture	29.494	0.087	3.091	9.369	1.693	0	0.019	50.059	0.6	94.412		2.32659	0.00623875	0.173005	0.799942	0.168942	0	0.00246549	3.35016	0.0301989		0.837541	0.814885	0.168942
granite EPS1-2161 m	filling fracture	27.325	0.076	4.206	9.049	1.723	0.006	0.035	50.442	1.676	94.538		2.16429	0.0054722	0.236373	0.775775	0.172638	0.00034152	0.00456025	3.38958	0.0847		0.847396	0.79128	0.172638
granite EPS1-2161 m	filling fracture	31.673	0.092	2.183	10.037	1.257	0	0.097	48.994	0.168	94.501		2.49589	0.00659046	0.122057	0.856089	0.125304	0	0.012574	3.27549	0.00844692		0.818873	0.881844	0.125304
granite EPS1-2161 m	filling fracture	30.089	0.036	2.25	9.886	1.454	0.009	0.042	49.338	0.017	93.121		0.218462	0.000237609	0.0115911	0.0776905	0.0133545	4.69591e-05	0.000501628	0.303912	7.87536e-05		0.0759779	0.0786673	0.0133545

## Sheet: Isotopic data
Location	Rock type	Filling type	calcite		dolomite			barite	quartz	fluids	Fluids deduced from calcite data		Fluids deduced from dolomite
			δ13C ‰PDB	δ18O	δ13C ‰PDB	δ18O	87Sr/86Sr	87Sr/86Sr	δ18O	87Sr/86Sr	d13C ‰ vs PDB	d18O ‰ vs SMOW	d13C ‰ vs PDB	d18O ‰ vs SMOW
				‰ SMOW		‰ SMOW			‰ SMOW		(± 0.1‰)	(± 0.5‰)	(± 0.3‰)	(± 0.6‰)
Saint Pierre Bois	granite	fracture						0.716273
Steinach	granite	fracture	-10.9	12.5
Waldhambach	granite						0.708993		+11.6 to +14.8
Waldhambach	Permian basalt						0.709817	0.709753
EPS1-1361.6 m	sandstone	fracture						0.712375
EPS1-1383.9 m	sandstone	porosity	-3.2	18	-3.4	20.3					-4.1	5	-5.5	5.5
EPS1-1395.1m	sandstone	porosity	-3.2	18.6	-3.5	20.9					-4.1	5.5	-5.6	6.1
EPS1-1399.3 m	sandstone	porosity	-3.2	13.9	-3.6	19.2					-4.1	0.8	-5.7	4.4
EPS1-1416.1 m	sandstone	porosity			-3.4	19.7							-5.4	4.8
EPS1-1416.1 m	sandstone	porosity	-2.9	18.3	-3.3	20.3					-3.8	5.2	-5.3	5.4
EPS1	present-day fluids									0.71147
EPS1-1418.4 m	granite	fracture			-4.4	23.3							-6.5	8.5
EPS1-1420.0 m	granite	fracture	-4.3	18.6	-6.2	19.4					-5.2	5.6	-8.3	4.6
EPS1-1427.3 m	granite	fracture			-7.5	20.2							-9.5	5.4
EPS1-1427.3 m	granite	fracture			-5.3	22.4	0.708685		+10.9 to +14.7				-7.4	7.6
EPS1-1430.6 m	granite	fracture			-7	19							-9	4.1
EPS1-1434.3 m	granite	fracture			-6.7	20.4							-8.8	5.5
EPS1-2161.7 m	granite	fracture	-9.1	13.9							-10	0.8
Data from Fouillac and Genter (1990)
GPK1-1376.8m	granite	fracture	-4.8	18.8							-5.69	5.73
GPK1-1376.8 m	granite	fracture	-6.2	21.2							-7.09	8.13
GPK1-1379.9 m	granite	fracture	-4.9	19.2							-5.79	6.13
GPK1-1813.9 m	granite	fracture	-1.5	11.5					19.4		-2.39	-1.57
GPK1-1998.5 m	granite	fracture	-8.1	13.4							-8.99	0.33
GPK1-1998.9 m	granite	fracture	-6.2	13.4							-7.09	0.33
